# Supplementary material for: Risk of Aneurysm Rupture (ROAR) study: protocol for a long-term, longitudinal, UK multicentre study of unruptured intracranial aneurysms
Source: PubMed Central journal article supplement (PMC10030903; doi:10.1136/bmjopen-2022-070504), 2023-03-16
Supplement: bmjopen-2022-070504.draft_revisions.pdf [file bmjopen-2022-070504.draft_revisions.pdf]

# BMJ Open

BMJ Open is committed to open peer review. As part of this commitment we make the peer review history of every article we publish publicly available.

When an article is published we post the peer reviewers' comments and the authors' responses online. We also post the versions of the paper that were used during peer review. These are the versions that the peer review comments apply to.

The versions of the paper that follow are the versions that were submitted during the peer review process. They are not the versions of record or the final published versions. They should not be cited or distributed as the published version of this manuscript.

BMJ Open is an open access journal and the full, final, typeset and author-corrected version of record of the manuscript is available on our site with no access controls, subscription charges or pay-per-view fees (<http://bmjopen.bmj.com>).

If you have any questions on BMJ Open's open peer review process please email [info.bmjopen@bmj.com](mailto:info.bmjopen@bmj.com)

# BMJ Open

## A UK multicentre long term longitudinal study of unruptured intracranial aneurysms: the Risk Of Aneurysm Rupture (ROAR) Study

|                               |                                                                                                                                                                                                                                                                                                                                                                                                                                                                                                                                                                                                                                                                                                                                                                                                                                                                                                                                                                                                                                                                                                                                                                                                                                                                                                                                                                                                                                                                                                                                                                                                                                                                                                                                                                                                                                                                                                                                                                                                                                            |
|-------------------------------|--------------------------------------------------------------------------------------------------------------------------------------------------------------------------------------------------------------------------------------------------------------------------------------------------------------------------------------------------------------------------------------------------------------------------------------------------------------------------------------------------------------------------------------------------------------------------------------------------------------------------------------------------------------------------------------------------------------------------------------------------------------------------------------------------------------------------------------------------------------------------------------------------------------------------------------------------------------------------------------------------------------------------------------------------------------------------------------------------------------------------------------------------------------------------------------------------------------------------------------------------------------------------------------------------------------------------------------------------------------------------------------------------------------------------------------------------------------------------------------------------------------------------------------------------------------------------------------------------------------------------------------------------------------------------------------------------------------------------------------------------------------------------------------------------------------------------------------------------------------------------------------------------------------------------------------------------------------------------------------------------------------------------------------------|
| Journal:                      | <i>BMJ Open</i>                                                                                                                                                                                                                                                                                                                                                                                                                                                                                                                                                                                                                                                                                                                                                                                                                                                                                                                                                                                                                                                                                                                                                                                                                                                                                                                                                                                                                                                                                                                                                                                                                                                                                                                                                                                                                                                                                                                                                                                                                            |
| Manuscript ID                 | bmjopen-2022-070504                                                                                                                                                                                                                                                                                                                                                                                                                                                                                                                                                                                                                                                                                                                                                                                                                                                                                                                                                                                                                                                                                                                                                                                                                                                                                                                                                                                                                                                                                                                                                                                                                                                                                                                                                                                                                                                                                                                                                                                                                        |
| Article Type:                 | Protocol                                                                                                                                                                                                                                                                                                                                                                                                                                                                                                                                                                                                                                                                                                                                                                                                                                                                                                                                                                                                                                                                                                                                                                                                                                                                                                                                                                                                                                                                                                                                                                                                                                                                                                                                                                                                                                                                                                                                                                                                                                   |
| Date Submitted by the Author: | 24-Nov-2022                                                                                                                                                                                                                                                                                                                                                                                                                                                                                                                                                                                                                                                                                                                                                                                                                                                                                                                                                                                                                                                                                                                                                                                                                                                                                                                                                                                                                                                                                                                                                                                                                                                                                                                                                                                                                                                                                                                                                                                                                                |
| Complete List of Authors:     | <p>Hall, Samuel; University Hospital Southampton NHS Foundation Trust, Department of Neurosurgery</p> <p>Birks, Jacqueline; University of Oxford, Centre for Statistics in Medicine</p> <p>Anderson, Ian; The Leeds Teaching Hospitals NHS Trust, Department of Neurosurgery</p> <p>Bacon, Andrew; Sheffield Teaching Hospitals NHS Foundation Trust, Department of Neurosurgery</p> <p>Brennan, Paul; Western General Hospital, Department of Clinical Neurosciences</p> <p>Bennett, David; NHS Tayside, Department of Neurosurgery</p> <p>Chavredakis, Emmanuel; Walton Centre NHS Foundation Trust, Department of Neurosurgery</p> <p>Critchley, Giles; University Hospitals Sussex NHS Foundation Trust, Department of Neurosurgery</p> <p>Dow, Graham; Nottingham University Hospitals NHS Trust, Department of Neurosurgery</p> <p>Downer, Jonathan; Western General Hospital, Department of Clinical Neurosciences</p> <p>Galea, James; University Hospital of Wales Healthcare NHS Trust, Neurosurgical Department</p> <p>Grover, Patrick; University College London Hospitals NHS Foundation Trust, National Hospital for Neurology and Neurosurgery</p> <p>Gurusinghe, Nihal; Lancashire Teaching Hospitals NHS Foundation Trust, Department of Neurosurgery</p> <p>Helmy, Adel; Cambridge University Hospitals NHS Foundation Trust, Department of neurosurgery</p> <p>Kounin, Gueorgui; Hull University Teaching Hospitals NHS Trust, Department of Neurosurgery</p> <p>Mukerji, Nitin; South Tees Hospitals NHS Foundation Trust, Department of Neurosurgery</p> <p>Patel, Hiren; Northern Care Alliance NHS Foundation Trust, Department of Neurosurgery</p> <p>Patel, Jash; Oxford University Hospitals NHS Foundation Trust, Department of Neurosurgery</p> <p>Ross, Nicholas; Newcastle Hospitals NHS Foundation Trust, Department of Neurosurgery</p> <p>St George, Jerome; NHS Greater Glasgow and Clyde, Institute of Neurological Sciences</p> <p>Teo, Mario; North Bristol NHS Trust, Department of Neurosurgery</p> |

|           |                                                                                                                                                                                                                                                                                                                                                                                                                                                                                                                                                                                                                                                                                                                                                                                                                                                                              |
|-----------|------------------------------------------------------------------------------------------------------------------------------------------------------------------------------------------------------------------------------------------------------------------------------------------------------------------------------------------------------------------------------------------------------------------------------------------------------------------------------------------------------------------------------------------------------------------------------------------------------------------------------------------------------------------------------------------------------------------------------------------------------------------------------------------------------------------------------------------------------------------------------|
|           | Tolias, Christos; King's College Hospital NHS Foundation Trust, Neurosurgery<br>Tzerakis, Nikolaos; University Hospitals of North Midlands NHS Trust, Department of Neurosurgery<br>Uff, Christopher; Barts Health NHS Trust, Department of Neurosurgery<br>van Beijum, Janneke; University Hospital of Wales Healthcare NHS Trust, Neurosurgical department<br>Veighey, Kristin; University Hospital Southampton NHS Foundation Trust, Department of Renal Medicine<br>White, Edward; University Hospitals Birmingham NHS Foundation Trust, Department of Neurosurgery<br>Whitfield, Peter; University Hospitals Plymouth NHS Trust, South West Neurosurgery Centre<br>Bulters, Diederik ; University Hospital Southampton NHS Foundation Trust, Department of Neurosurgery<br>ROAR Investigators, ROAR Investigators; University Hospital Southampton NHS Foundation Trust |
| Keywords: | EPIDEMIOLOGY, Stroke < NEUROLOGY, NEUROSURGERY                                                                                                                                                                                                                                                                                                                                                                                                                                                                                                                                                                                                                                                                                                                                                                                                                               |

SCHOLARONE™  
Manuscripts

**A UK multicentre long term longitudinal study of unruptured intracranial aneurysms: the Risk Of Aneurysm Rupture (ROAR) Study**

Samuel Hall<sup>1</sup>, Jacqueline Birks<sup>2</sup>, Ian Anderson,<sup>3</sup> Andrew Bacon,<sup>4</sup> Paul Brennan,<sup>5</sup> David Bennett,<sup>6</sup> Emmanuel Chavredakis,<sup>7</sup> Giles Critchley,<sup>8</sup> Graham Dow,<sup>9</sup> Jonny Downer,<sup>5</sup> James Galea,<sup>10</sup> Patrick Grover,<sup>11</sup> Nihal Gurusinghe,<sup>12</sup> Adel Helmy,<sup>13</sup> Gueorgui Kounin,<sup>14</sup> Nitin Mukerji,<sup>16</sup> Hiren Patel,<sup>17</sup> Jash Patel,<sup>18</sup> Nicholas Ross,<sup>19</sup> Jerome St George,<sup>20</sup> Mario Teo,<sup>21</sup> Christos Talias,<sup>22</sup> Nikolaos Tzerakis,<sup>23</sup> Christopher Uff,<sup>24</sup> Janneke van Beijum,<sup>10</sup> Kristin Veighey,<sup>25</sup> Edward White,<sup>26</sup> Peter Whitfield,<sup>27</sup> Diederik Bulters<sup>1</sup>

<sup>1</sup> Department of Neurosurgery, University Hospitals Southampton NHS Foundation Trust, Southampton, UK

<sup>2</sup> Centre for Statistics in Medicine, Medical Sciences Division, University of Oxford, Oxford, UK

<sup>3</sup> Department of Neurosurgery, The Leeds Teaching Hospitals NHS Trust, Leeds, LS1 3EX

<sup>4</sup> Sheffield Teaching Hospitals NHS Foundation Trust, Sheffield, S10 2JF

<sup>5</sup> Department of Clinical Neurosciences, NHS Lothian, Edinburgh, EH1 3EG

<sup>6</sup> Department of Neurosurgery, NHS Tayside, Dundee, DD2 1SG

<sup>7</sup> Department of Neurosurgery, Walton Centre NHS Foundation Trust, Liverpool, L9 7LJ

<sup>8</sup> Department of Neurosurgery, University Hospitals Sussex NHS Foundation Trust, Brighton, BN2 5BE

<sup>9</sup> Department of Neurosurgery, Nottingham University Hospitals NHS Trust, Nottingham, NG7 2UH

<sup>10</sup> Neurosurgical Department, Floor 4, Corridor B, University Hospital Wales, Heath Park, Cardiff CF14 4XW.

<sup>11</sup> National Hospital for Neurology and Neurosurgery, University College London Hospitals NHS Foundation Trust, London, WC1N 3BG

<sup>12</sup> Department of Neurosurgery, Lancashire Teaching Hospitals NHS Foundation Trust, Preston, PR2 9HT

<sup>13</sup> Department of Neurosurgery, Cambridge University Hospitals NHS Foundation Trust, Cambridge, CB2 0QQ

<sup>14</sup> Department of Neurosurgery, Hull University Teaching Hospitals NHS Trust, Hull, HU3 2JZ

<sup>15</sup> Department of Radiology, Hull University Teaching Hospitals NHS Trust, Hull, HU3 2JZ

<sup>16</sup> Department of Neurosurgery, South Tees Hospitals NHS Foundation Trust, Middlesbrough, TS4 3BW

<sup>17</sup> Department of Neurosurgery, Northern Care Alliance NHS Foundation Trust, Salford, M6 8HD

<sup>18</sup> Department of Neurosurgery, Oxford University Hospitals NHS Foundation Trust, Oxford, OX3 9DU

<sup>19</sup> Department of Neurosurgery, Newcastle Hospitals NHS Foundation Trust, Newcastle, NE1 4LP

<sup>20</sup> Institute of Neurological Sciences, NHS Greater Glasgow and Clyde, Glasgow, G51 4TF

1  
2  
3 <sup>21</sup> Department of Neurosurgery, North Bristol NHS Trust, Bristol, BS10 5NB  
4

5 <sup>22</sup> Department of Neurosurgery, King's College Hospital NHS Foundation Trust, London, SE5 9RS  
6

7 <sup>23</sup> Department of Neurosurgery, University Hospitals of North Midlands NHS Trust, Stoke-on-Trent,  
8 ST4 6QG  
9

10 <sup>24</sup> Department of Neurosurgery, Barts Health NHS Trust, London, E1 1BB  
11

12 <sup>25</sup> Department of Renal Medicine, University Hospitals Portsmouth NHS Trust, Portsmouth, PO6 3LY  
13

14 <sup>26</sup> Department of Neurosurgery, University Hospitals Birmingham NHS Foundation Trust,  
15 Birmingham, B15 2WB  
16

17 <sup>27</sup> South West Neurosurgery Centre, University Hospitals Plymouth NHS Trust, Plymouth PL6 8DH  
18  
19

20  
21 Corresponding author:

22 Mr Diederik Bulters

23 [dbulters@nhs.net](mailto:dbulters@nhs.net)

24 Tel: 0044 2381 205311

25 Department of neurosurgery

26 Southampton General Hospital

27 Tremona Road

28 Southampton

29 SO16 6YD

30 United Kingdom  
31  
32  
33  
34  
35  
36  
37  
38  
39  
40  
41  
42  
43  
44  
45  
46  
47  
48  
49  
50  
51  
52  
53  
54  
55  
56  
57  
58  
59  
60

## Abstract

### Introduction:

Unruptured intracranial aneurysms (UIA) are common in the adult population, but only a relatively small proportion will rupture. It is therefore essential to have accurate estimates of rupture risk to target treatment towards those who stand to benefit and avoid exposing patients to the risks of unnecessary treatment. The best available UIA natural history data is the PHASES study. However, this has never been validated and given the known heterogeneity in the populations, methods and biases of the constituent studies, there is a need to do so. There are also many potential predictors not considered in PHASES that require evaluation, and the estimated rupture risk is largely based on short term follow up (mostly 1 year). This study's aims are: 1) test the accuracy of PHASES in a UK population, 2) evaluate additional predictors of rupture and 3) assess long-term UIA rupture rates.

### Methods and analysis:

The Risk Of Aneurysm Rupture Study is a longitudinal multicentre study that will identify patients with known UIA seen in neurosurgery units. Patients will have baseline demographics and aneurysm characteristics collected by their neurosurgery unit and then a single aggregated national cohort will be linked to databases of hospital admissions and deaths to identify all patients who may have subsequently suffered a subarachnoid haemorrhage. All matched admissions and deaths will be checked against medical records to confirm the diagnosis of aneurysmal subarachnoid haemorrhage. The target sample size is 20,000 patients. The primary outcome will be aneurysm rupture resulting in hospital admission or death. Cox regression models will be built to test each of the study's aims.

### Ethics and dissemination:

Ethical approval has been given by South Central Hampshire A REC and Confidentiality Advisory Group support provided under Section 251 of the NHS Act 2006. The results will be disseminated in peer reviewed journals.

**Protocol version:** 2.1 12<sup>th</sup> July 2022

**Trial registration number:** ISRCTN 17658526. Date of registration: 21/4/2021.

**Key words:** intracranial aneurysm, aneurysm cerebral, rupture risk, aneurysmal subarachnoid haemorrhage, natural history, survival analysis, validation study.

### Strengths and limitations of this study

- This study will validate the PHASES score for UIA rupture risk prediction in a population relevant to the UK.
- The UIA treatment rate is lower in the UK than in many other developed countries, which reduces selection bias and allows observation of the true UIA natural history.
- The large cohort size will allow inclusion of more covariates in prediction models than has been possible in previous studies.
- This study will include rare, but salient, patient groups such as those with Autosomal Dominant Polycystic Kidney Disease (ADPKD).

- The UK has uniform medical coverage and given virtually all patients who suffer subarachnoid haemorrhage seek medical help, the strategy to use national databases for hospital admissions and deaths in a defined population provides a robust method for identification of outcome events with minimal loss to follow up.
- This design makes ROAR not only an order of magnitude larger than previous natural history studies but allows for repeated follow up and generation of true long-term rupture risk.

## Introduction

Unruptured intracranial aneurysms (UIA) are common in the general population with an estimated prevalence of 2.3-3.2%.<sup>1,2</sup> Aneurysm rupture resulting in subarachnoid haemorrhage is much less common with an annual incidence of 9 per 100,000 of the population.<sup>3</sup> It is estimated that 1.4% of UIA rupture per year.<sup>4</sup> Subarachnoid haemorrhage is a serious complication of UIA with a mortality rate of up to 67% and half of the survivors are left disabled.<sup>5</sup> Unruptured intracranial aneurysms can be prophylactically treated to prevent rupture, however these procedures carry at least a 5% risk of complications.<sup>6</sup> In the absence of randomised controlled trial data, the decision on proceeding to prophylactic treatment is dependent on natural history data. Decisions regarding whether to follow up untreated patients radiologically also depend on our understanding of this data.

The first natural history study, and the most applicable to the UK population, was the International Study of Unruptured Intracranial Aneurysms (ISUIA).<sup>7</sup> However, concerns over the data are well documented,<sup>8</sup> and the generalisability of the results may be undermined by selection bias resulting from a high treatment rate of 71%. Five further natural history studies have been conducted,<sup>9-13</sup> all in different populations with different selection biases and different periods of follow up, and yielding different results. For example, Juvela *et al.*<sup>9</sup> reported rupture rates of 26% of UIA<7mm over 30 years compared to 0% in similar aneurysms extrapolated from ISUIA. This difference may reflect a higher risk in the Finnish population or difference in study methodology – it is not known which.

These six studies were combined in an individual patient level meta-analysis as the PHASES score which provides an estimate for 5 year rupture risk.<sup>4</sup> The PHASES score is the best available evidence for UIA rupture risk. However, it has never been externally validated, and particularly given the heterogeneity in the underlying studies, there is an urgent need to do so.

Furthermore, PHASES was limited to the risk factors available for analysis from the underlying studies. There are many more patient and aneurysm features which have been shown to be associated with rupture or that may be hypothesised to predispose to rupture. These range from common modifiable variables like smoking, to rarer non-modifiable ones like family history and ADPKD.

One of the main shortfalls of PHASES is that, with one exception, the constituent studies are based on short lengths of follow-up, with the majority of patients followed up just 1 year, which has been used to generate 5 year risks in PHASES. Clinicians further extrapolate PHASES to patient's lifetime risk which all makes the large assumption that risk does not change over time. Moreover, even if the

1  
2  
3 bleeding risk remains constant over time, any seemingly small inaccuracies in short term estimates  
4 can become very significant when extrapolated over many decades.  
5  
6  
7

8 We therefore designed a large multicentre longitudinal study of patients with UIAs to address these  
9 concerns.  
10  
11  
12

### 13 **Methods and analysis**

#### 14 *Objectives*

15 This study has three objectives:  
16  
17

- 18 1) To measure the accuracy of the PHASES score at predicting UIA rupture rates in the UK  
19 population.
- 20 2) To develop a new, more personalised, predictive model for aneurysm rupture incorporating  
21 additional co-variables thought to influence risk.
- 22 3) To measure aneurysm rupture risk over time periods greater than 5 years.  
23  
24  
25  
26  
27

#### 28 *Study Setting*

29 This is a multicentre study conducted at up to 30 tertiary neurosurgery units in the United Kingdom.  
30 Patients will be identified by the neurosurgery unit who diagnosed their unruptured intracranial  
31 aneurysm. Each unit will collect their baseline data on patients' clinical and aneurysm characteristics  
32 from the time of diagnosis. Central searches of hospital admissions databases, and data analysis, will  
33 be performed by the co-ordinating team at University Hospital Southampton NHS Foundation Trust  
34 and the University of Oxford. A separate cohort enriched in patients with autosomal dominant  
35 polycystic kidney disease will be established using similar methodology, from up to 70 renal units in  
36 the United Kingdom.  
37  
38  
39  
40

#### 41 *Study design*

42 The ROAR study is a longitudinal study that uses a hybrid design of patient identification at regional  
43 neurosurgical units and prospectively collected national hospital admissions databases for outcome  
44 events. The study will establish a cohort of patients with a UIA and measure how many subsequently  
45 ruptured. This observed rupture rate can be compared to a rate estimated by the PHASES score to  
46 determine its accuracy.  
47  
48  
49  
50

51 Each neurosurgery unit in the UK will be invited to search their medical records for patients  
52 diagnosed with a UIA. This search method will be tailored by the individual neurosurgery unit based  
53 on what records they keep, but search strategies may include: Multi-Disciplinary Team (MDT)  
54 meeting logs, radiology reports or electronic patient records. The search strategy will be predefined  
55 by individual units dependent on their record systems. The maximum date range for identifying  
56 patients is documents dated 1/1/2006-31/12/2020, however, this period may be shorter for each  
57 unit depending on availability of records. Whatever date range is chosen by the unit it will be pre-  
58 defined and if the patient's UIA was newly diagnosed during this period it will be classed as *new* and  
59  
60



1  
2  
3 those who were diagnosed before this period but identified from a document during the aneurysm  
4 follow-up will be classed as *follow-up*, and their recruitment date recorded as the date of the  
5 document from which they were identified. This will minimise the prevalence-incidence (Neyman)<sup>14</sup>  
6 selection bias created by identifying patients diagnosed before the unit's search period but who  
7 survive without rupture to make it into the search period whereas their counterparts diagnosed at  
8 the same time who rupture and die are not identified. It will also allow comparison of rupture risk of  
9 newly diagnosed aneurysms and those with known diagnoses. Baseline clinical characteristics and  
10 aneurysm characteristics will be collected as per the common data elements for UIA research.<sup>15</sup> All  
11 data collectors will undergo training in coding data elements delivered by the co-ordinating centre.  
12 Collecting baseline data from local medical records allows deeper phenotypic typing and higher data  
13 fidelity than using national admission databases.  
14  
15  
16  
17  
18

19 Patient identifiable details (name, date of birth, post code, NHS/CHI number) will be securely sent by  
20 each neurosurgery unit to the co-ordinating centre for consolidation and linkage to the national  
21 databases for hospital admissions. These databases are: Hospital Episode Statistics (HES), Patient  
22 Episode Database for Wales (PEDW) and Scottish Morbidity Database (SMD). These databases also  
23 link to the Civil Registrations - Death and National Registry Scotland for death records. Patients will  
24 be linked to hospital admissions based on ICD10 diagnosis codes for intracranial haemorrhages and  
25 OPCS4 codes for aneurysm occlusion treatments. These databases record every hospital admission  
26 in their respective country and thus using this as the outcome source, combined with death records,  
27 will allow identification of every aneurysmal subarachnoid haemorrhage (aSAH) regardless of  
28 whether they were managed in a neurosurgery unit, a district general hospital, migrated out of the  
29 region in which their UIA was diagnosed, or died in the community. The number of patients with  
30 aSAH who are not captured by this method, either because they do not present to hospital or  
31 emigrate out of the UK, is expected to be very small. Rupture rates can be adjusted based on  
32 national emigration rates.  
33  
34  
35  
36  
37  
38

39 Patients will be censored if there is any occlusive treatment of the unruptured intracranial aneurysm  
40 or patient death. Occlusive treatment includes either microsurgical or endovascular techniques  
41 either partial or complete. If none of these censoring events are observed, then they will be  
42 censored on the day the cohort is submitted to the HES/PEDW/SMD databases.  
43  
44  
45

46 The ICD10 codes to be searched for rupture events have been selected in accordance with the UK  
47 Biobank stroke research and include: aneurysmal subarachnoid haemorrhage (I60.1-9), intra-  
48 cerebral haemorrhage (I61.0-9), traumatic subarachnoid haemorrhage (S06.6) and spontaneous  
49 subdural haemorrhage (I62.00-I62.02).<sup>16</sup> The use of codes beyond those for aneurysmal  
50 subarachnoid haemorrhage will capture any hospital admissions for aneurysm rupture which have  
51 resulted in other forms of intracranial bleed or have been mis-coded.  
52  
53

54 It is expected that the use of codes beyond that for just aSAH will return many admissions not due to  
55 aneurysm rupture. The matched hospital admissions, and death records, will be returned to the co-  
56 ordinating unit who will in turn use pseudonymisation numbers to inform the respective local unit of  
57 their patient's admission for possible aneurysmal subarachnoid haemorrhage. The local unit will  
58 review the imaging studies, discharge summaries and death certificates for these admissions and  
59  
60

confirm or refute the diagnosis. Statistical analysis will begin once the diagnosis for all of the matched admissions is confirmed.

### *Eligibility criteria*

#### Inclusion:

1. Age 18 years or older.
2. Intracranial, intradural, unruptured aneurysm.
3. Aneurysm confirmed on cranial angiogram (CTA/MRA/DSA).
4. Identification of UIA from records between 1<sup>st</sup> January 2006 - 31<sup>st</sup> December 2020.

#### Exclusion:

1. Mycotic or vasculitic aneurysms.
2. Aneurysm diagnosed on CT or MRI alone.
3. AVM associated flow aneurysms.
4. Extradural aneurysms (e.g. intra-cavernous).
5. Aneurysms treated by either microsurgical or endovascular techniques before the search period.
6. Small lesions uncertain as to whether they are truly aneurysmal (“dilatation”, “bulge”, ‘Infundibulum”).

### *Outcomes*

- Primary endpoints

The primary endpoint is rupture of an untreated unruptured intracranial aneurysm at a timepoint at least one day following diagnosis. A rupture event is defined as either radiological evidence of aneurysmal subarachnoid haemorrhage in a distribution consistent with the aneurysm location, CSF spectrophotometry positive for xanthochromia per the local unit’s reference range, or death certificate stating subarachnoid haemorrhage in either 1a-c.

- Secondary endpoints

The secondary endpoint is aneurysm growth on follow up imaging. Recruiting units will record if patients have undergone follow up imaging. Aneurysm growth will be recorded if there was any clinically observable growth, in the opinion of a consultant neuroradiologist or an MDT, when directly comparing baseline and follow up scans.

### *Data transmission and editing*

The recruiting units will populate two data sheets, one containing patient identifiable details required for hospital admission database searches and a second containing clinical details only. These two spreadsheets will be cross-referenced using an aneurysm-level pseudonymisation number contained in both spreadsheets. Recruiting units will send each data sheet to the co-ordinating unit separately through a 256bit end to end encryption service.

1  
2  
3  
4  
5 The requirement for editing the data will be minimised through the use of restricted fields and pre-  
6 defined lists of valid codes for each element on the datasheet. All queries and discrepancies raised  
7 by the co-ordinating centre regarding the data entry will be submitted to the respective recruiting  
8 units through a single query sheet referencing the pseudonymisation number.  
9

### 10 11 12 *Sample size*

13  
14 There are no accepted methods for power calculation for validation studies of prognostic models.  
15 Earlier methods included the rule of thumb to have ten events for every covariate tested, however,  
16 more modern methods for minimum sample size calculation have been proposed by Riley *et al.*<sup>17</sup>  
17 The online package *pmsampsize* uses the Riley method to estimate the minimum sample size. Using  
18 figures from our feasibility work (2,124 patients with 60 rupture events over 4,010 patient years),  
19 estimating 28 degrees of freedom, and varying Cox-Snell R<sup>2</sup> value d from 0.03 to 0.05 resulted in a  
20 minimum sample size ranging from 5,143 to 8,559. The number of degrees of freedom allows for all  
21 categorical variables as well as continuous variables such as patient age or aneurysm size which may  
22 require polynomial equations.  
23

24  
25 The Riley method is yet to be widely utilized and does not consider the prevalence of uncommon  
26 variables such as ADPKD. The older rule of thumb requiring 10 events per covariate was therefore  
27 also considered. For the first objective, the 6 covariates in the PHASES score will be tested  
28 suggesting at least 60 SAHs will need to be captured. ISUIA recorded 51 ruptures in 1,692 patients  
29 over 4.1 years. Sixty events may therefore be expected in 1,990 patients with 8,161 years of follow  
30 up. For the second objective, 120 events will need to be observed to account for the 6 additional  
31 commonly occurring covariates which would be expected in 3,981 patients with 16,332 years of  
32 follow up.  
33

34  
35 However, the 10 events per covariate rule of thumb does not consider the prevalence of the  
36 covariate in the study population. Therefore, rarely occurring populations may have insufficient data  
37 to estimate risk. ADPKD is one such population and including it as a covariate requires a larger study  
38 size. In ADPKD 10 events are expected in 1,360 patient years of follow up assuming the risk of SAH is  
39 similar to the general population. However, 16,332 years follow up would only yield 195 years in  
40 patients with ADPKD (based on a population study which found 53/4,436 patients with UIA had  
41 ADPKD).<sup>18</sup> Therefore 113,905 years of follow up would be required to capture 10 ruptures amongst  
42 1,340 years follow up in ADPKD patients. This equates to a total cohort of 22,781 patients.  
43

44  
45 The TRIPOD guidelines highlight the lack of consensus of how to calculate a sample size and suggest  
46 aiming for larger sample sizes which give more precise and reliable results. Smaller sample sizes are  
47 at risk of performance optimism. Therefore, the ROAR study will aim to collect 20,000 patients.  
48 Based on feasibility studies, this is the maximum practical sample size, and power calculations show  
49 is sufficient to generate precise estimates and account for all covariates.  
50  
51

### 52 53 *Statistical analysis*

- 54 • *Objective 1 - PHASES validation*

55  
56 The PHASES study provides the coefficients from their Cox regression model and baseline survival at  
57 5 years which allows the absolute 5-year risk of rupture to be calculated for all patients who are not  
58 censored before 5 years. Time to censoring will be calculated (whichever is soonest of the date of  
59 treatment, date of death or the HES/PEDW/SMD search date) to ensure 5 years of follow up if  
60

1  
2  
3 rupture has not occurred. Discrimination will be assessed using Harrell's C-index of concordance and  
4 Royston and Sauerbrei's D statistic. Calibration will be assessed at the 5 year time point using the  
5 method in Royston (2014).<sup>19</sup> These will be used to calculate the number of SAH events per 5 years  
6 for each PHASES score ( $\leq 2$  to 12+) and expressed as a percentage with 95% confidence interval to  
7 compare to the PHASES estimates.  
8  
9

10  
11  
12 • *Objective 2 - Additional prognostic factors*

13 A new risk prediction model for rupture will be developed using the total data set, including the  
14 additional possible risk factors. The Cox regression model will be used for risk of rupture. The  
15 absolute risks can be estimated at relevant time intervals, 2, 5 and 10 years. Numbers of missing  
16 values will be summarised for each factor. Multiple imputation will be used to replace missing  
17 values. Discrimination of the final model will be assessed with Harrell's C-statistic. Internal validity  
18 will be assessed by bootstrap resampling.  
19  
20

21  
22  
23 • *Objective 3 – Long term rupture rates*

24 All patients, including those who underwent aneurysm occlusion, will be included in time-to-event  
25 analysis which will cover the whole duration of available follow up. This will include Kaplan-Meier  
26 and proportional hazards models for univariate and multivariate survival curve fitting. A cumulative  
27 Hazard plot will be used to assess if rupture risk is constant or varies with time from diagnosis.  
28  
29

30  
31 Once the cohort is established, funding will be sought for repeated searches at regular intervals (5  
32 yearly) to update models and provide progressively longer-term rupture rates.  
33  
34

35  
36 *Patient and public involvement*

37  
38 A workgroup was organised with the Wessex Subarachnoid Haemorrhage Support Group to discuss  
39 UIA research where it was confirmed that better decision making on aneurysm treatment is the  
40 main concern for patients, but patients do not want to have their management randomised and  
41 therefore an RCT is unlikely to succeed. Consequently, a better understanding of the natural history  
42 of UIA was deemed the top priority and that long term, ideally lifetime risks, are what is relevant to  
43 patients. This formed the basis of the current study.  
44  
45

46 During May 2020, while face to face public involvement was not possible due to the COVID  
47 pandemic, patients in the neurovascular telephone clinic at University Hospital Southampton were  
48 surveyed to assess the study design. All patients strongly supported a study of the natural history of  
49 UIA. Although some said they would decline participation in imaging or interventional studies, all  
50 confirmed they would be happy for their records to be searched for a natural history study, without  
51 full informed consent as is proposed.  
52  
53

54  
55 *Ethical considerations (including informed consent)*

56  
57 Seeking informed consent from all patients to break confidentiality and transfer their identifiable  
58 details is not possible without biasing the results. Patients whose aneurysm ruptures have a high  
59 likelihood of death or severe disability which would leave them unable to provide informed consent.  
60

1  
2  
3 If informed consent was mandatory, the final cohort would contain an underrepresentation of  
4 patients whose aneurysm ruptured, thus skewing the observed rupture rates.  
5  
6  
7

8 In order to process patient identifiable data without consent the study has been given conditional  
9 support under Section 251 from the HRA Confidentiality Advisory Group (21/CAG/0033). This allows  
10 the transfer of patient identifiable data outside of the direct clinical care team for the purpose of this  
11 study. The patient identifiable data can thus be transferred to the co-ordinating team who in turn  
12 can upload this data to the HES/PEDW/SMD databases. The protocol has also been reviewed by the  
13 South Central Hampshire A Research Ethics Committee and issued a favourable opinion in March  
14 2021 (21/SC/0064). The REC and CAG committees will be updated on all significant protocol  
15 amendments by the study co-ordinator.  
16  
17  
18

### 19 20 *Monitoring*

21 As a study without direct patient contact there will not be a separate data monitoring committee.  
22 Instead, this role will be conducted by the trial management committee.  
23  
24  
25

### 26 27 *Dissemination and Data availability*

28 The results will be disseminated in peer reviewed journals. Authorship will follow International  
29 Committee of Medical Journal Editors recommendations and professional writers will not be used.  
30 Upon completion of the study, the anonymised dataset will be available both to members of the  
31 ROAR collaboration and other external researchers. They will be available from the chief investigator  
32 upon reasonable request.  
33  
34  
35  
36

### 37 38 **Discussion**

39 Although the natural history of UIA has been previously investigated through multiple prospective  
40 studies, the rupture rate has not yet been reliably established. In the absence of randomised clinical  
41 data, the natural history of aneurysm rupture forms a core part of treatment decision making. The  
42 PHASES score is currently the best available evidence for estimating rupture risk. However, it has  
43 never been validated and is limited to estimating risks for 5 years only. The ROAR study will provide  
44 observed rupture rates of UIA in clinical practice in the UK which will be used to assess the accuracy  
45 of the PHASES score, build models with additional covariates and observe rupture rates beyond 5  
46 years.  
47  
48  
49  
50

### 51 52 **References**

- 53  
54 1 Vlak, M. H., Algra, A., Brandenburg, R. & Rinkel, G. J. Prevalence of unruptured intracranial  
55 aneurysms, with emphasis on sex, age, comorbidity, country, and time period: a systematic  
56 review and meta-analysis. *Lancet Neurol* **10**, 626-636, doi:10.1016/S1474-4422(11)70109-0  
57 (2011).  
58  
59  
60

- 1  
2  
3 2 Cras, T. Y. *et al.* Determinants of the Presence and Size of Intracranial Aneurysms in the  
4 General Population: The Rotterdam Study. *Stroke* **51**, 2103-2110,  
5 doi:10.1161/STROKEAHA.120.029296 (2020).  
6  
7 3 de Rooij, N. K., Linn, F. H., van der Plas, J. A., Algra, A. & Rinkel, G. J. Incidence of  
8 subarachnoid haemorrhage: a systematic review with emphasis on region, age, gender and  
9 time trends. *J Neurol Neurosurg Psychiatry* **78**, 1365-1372, doi:10.1136/jnnp.2007.117655  
10 (2007).  
11 4 Greving, J. P. *et al.* Development of the PHASES score for prediction of risk of rupture of  
12 intracranial aneurysms: a pooled analysis of six prospective cohort studies. *Lancet Neurol* **13**,  
13 59-66, doi:10.1016/S1474-4422(13)70263-1 (2014).  
14 5 Nieuwkamp, D. J. *et al.* Changes in case fatality of aneurysmal subarachnoid haemorrhage  
15 over time, according to age, sex, and region: a meta-analysis. *Lancet Neurol* **8**, 635-642,  
16 doi:10.1016/S1474-4422(09)70126-7 (2009).  
17 6 Algra, A. M. *et al.* Procedural Clinical Complications, Case-Fatality Risks, and Risk Factors in  
18 Endovascular and Neurosurgical Treatment of Unruptured Intracranial Aneurysms: A  
19 Systematic Review and Meta-analysis. *JAMA Neurol* **76**, 282-293,  
20 doi:10.1001/jamaneurol.2018.4165 (2019).  
21 7 Wiebers, D. O. *et al.* Unruptured intracranial aneurysms: natural history, clinical outcome,  
22 and risks of surgical and endovascular treatment. *Lancet* **362**, 103-110 (2003).  
23 8 Raymond, J. *et al.* Unruptured Intracranial Aneurysms. A Critical Review of the International  
24 Study of Unruptured Intracranial Aneurysms (ISUIA) and of Appropriate Methods to Address  
25 the Clinical Problem. *Interv Neuroradiol* **14**, 85-96, doi:10.1177/159101990801400111  
26 (2008).  
27 9 Juvela, S., Poussa, K., Lehto, H. & Porras, M. Natural history of unruptured intracranial  
28 aneurysms: a long-term follow-up study. *Stroke* **44**, 2414-2421,  
29 doi:10.1161/STROKEAHA.113.001838 (2013).  
30 10 Morita, A. *et al.* The natural course of unruptured cerebral aneurysms in a Japanese cohort.  
31 *N Engl J Med* **366**, 2474-2482, doi:10.1056/NEJMoa1113260 (2012).  
32 11 Wermer, M. J. *et al.* Yield of short-term follow-up CT/MR angiography for small aneurysms  
33 detected at screening. *Stroke* **37**, 414-418, doi:10.1161/01.STR.0000199077.06390.35  
34 (2006).  
35 12 Sonobe, M., Yamazaki, T., Yonekura, M. & Kikuchi, H. Small unruptured intracranial  
36 aneurysm verification study: SUAVe study, Japan. *Stroke* **41**, 1969-1977,  
37 doi:10.1161/STROKEAHA.110.585059 (2010).  
38 13 Ishibashi, T. *et al.* Unruptured intracranial aneurysms: incidence of rupture and risk factors.  
39 *Stroke* **40**, 313-316, doi:10.1161/STROKEAHA.108.521674 (2009).  
40 14 Delgado-Rodríguez, M. & Llorca, J. Bias. *J Epidemiol Community Health* **58**, 635-641,  
41 doi:10.1136/jech.2003.008466 (2004).  
42 15 Hackenberg, K. A. M. *et al.* Definition and Prioritization of Data Elements for Cohort Studies  
43 and Clinical Trials on Patients with Unruptured Intracranial Aneurysms: Proposal of a  
44 Multidisciplinary Research Group. *Neurocrit Care* **30**, 87-101, doi:10.1007/s12028-019-  
45 00729-0 (2019).  
46 16 Woodfield, R., Grant, I., Sudlow, C. L., Group, U. B. S. O. & Group, U. B. F.-U. a. O. W.  
47 Accuracy of Electronic Health Record Data for Identifying Stroke Cases in Large-Scale  
48 Epidemiological Studies: A Systematic Review from the UK Biobank Stroke Outcomes Group.  
49 *PLoS One* **10**, e0140533, doi:10.1371/journal.pone.0140533 (2015).  
50 17 Riley, R. D. *et al.* Calculating the sample size required for developing a clinical prediction  
51 model. *BMJ* **368**, m441, doi:10.1136/bmj.m441 (2020).  
52 18 Nurmonen, H. J. *et al.* Polycystic kidney disease among 4,436 intracranial aneurysm patients  
53 from a defined population. *Neurology* **89**, 1852-1859, doi:10.1212/WNL.0000000000004597  
54 (2017).  
55  
56  
57  
58  
59  
60

- 1  
2  
3 19 Royston, P. Tools for Checking Calibration of a Cox Model in External Validation: Approach  
4 Based on Individual Event Probabilities. *The Stata Journal* **14**, 738-755,  
5 doi:10.1177/1536867x1401400403 (2014).  
6  
7  
8

9 **Authors' contributions**

10 DB conceived the study. DB, SH, and JB designed the protocol. JB provided statistical support and  
11 advised on study design. PG, DD and CH helped piloting and testing the protocol. CT, MT, JP, CU, HP,  
12 NG, IA, NT, JvB and JG provided further feedback on the protocol. All remaining authors contributed  
13 to the set-up of the study, have reviewed the protocol and approved the final manuscript.  
14  
15  
16

17  
18 **Conflict of interest**

19 None of the authors have any conflicts to declare.  
20  
21  
22

23  
24 **Sponsor contact information**

25 Sponsor: University Hospital Southampton NHS Foundation Trust  
26

27 Sponsor reference: RHM NEU0390  
28

29 Contact name: Mrs Sharon Davies-Dear  
30

31 Contact email: [Sharon.davies-dear@uhs.nhs.uk](mailto:Sharon.davies-dear@uhs.nhs.uk)  
32  
33  
34

35 **Sponsor and funder involvement**

36 This study/project is funded by the National Institute for Health Research (NIHR) Research for  
37 Patient Benefit programme (NIHR203628). The views expressed are those of the author(s) and not  
38 necessarily those of the NIHR or the Department of Health and Social Care.  
39  
40  
41

42 This work is also supported by: Smile4Wessex (no grant number) and the Polycystic Kidney Disease  
43 Charity (PKD-21-03). Neither the sponsor nor any of the funding sources had a role in designing the  
44 study protocol. They will also have no role in the analysis of data nor submission of results.  
45  
46  
47  
48

49 **ROAR Collaborators**

50 Frederick Ewbank,<sup>1</sup> Stefan Mitrasinovic,<sup>1</sup> Oliver Croft,<sup>1</sup> Dominic Townsend<sup>1</sup>  
51

52 Neeraj Kalra,<sup>3</sup> Imogen Kirkpatrick,<sup>3</sup> Nicole Handy<sup>3</sup>  
53

54 Alex Rossdeutsch,<sup>4</sup> Ellie Courtney,<sup>4</sup> Zoe Stone<sup>4</sup>  
55

56 Jonny Downer,<sup>5</sup> James Loan,<sup>5</sup> Anthony Wiggins,<sup>5</sup> Jay Park,<sup>5</sup> Niamh Rafferty<sup>5</sup>  
57

58 Nathan McSorley,<sup>6</sup> Ajitesh Anand,<sup>6</sup> Armin Nazari<sup>6</sup>  
59  
60

1  
2  
3 Giannis Sokratous,<sup>7</sup> Basel Taweel,<sup>7</sup> Kartik Goyal<sup>7</sup>  
4

5 John Norris,<sup>8</sup> Hannah-Marie Culley<sup>8</sup>, Mukul Arora<sup>8</sup>  
6

7 Milo Hollingworth,<sup>9</sup> Megan Burns,<sup>9</sup> Benjamin Armstrong<sup>9</sup>  
8

9 Janneke van Beijnum,<sup>10</sup> Harsh Bhatt,<sup>10</sup> David Lowes,<sup>10</sup> Debra Faulkner<sup>10</sup>  
10

11 Ciaran Hill,<sup>11</sup> Debayan Dasgupta,<sup>11</sup> Shuja Yaqub,<sup>11</sup> Yuzhi Phuah,<sup>11</sup> Olivier Sluijters,<sup>11</sup> Neda Oskooee,<sup>11</sup>  
12 Viraj Pamar,<sup>11</sup> Tarek Elmenofi,<sup>11</sup> Justyna Ekert<sup>11</sup>  
13

14 Alex Fung,<sup>13</sup> Rebecca Legge<sup>13</sup>  
15

16 Srihari Deepak,<sup>15</sup> Vigneshwar Veerappan,<sup>14</sup> Swarnava Gupta,<sup>14</sup> Sumeet Sasane,<sup>14</sup> May Ting Tan<sup>15</sup>  
17

18 Lucie Ferguson<sup>16</sup>  
19

20 Matthew Myers,<sup>4,17</sup> Antonio Bonardi,<sup>17</sup> Holly Tetlow,<sup>17</sup> Charlotte Dunkerley,<sup>17</sup> Malvika Pandey,<sup>17</sup>  
21 William Giffin,<sup>17</sup> Iqbal Bin Lokman,<sup>17</sup> Danielle Hurst,<sup>17</sup> Daniel Ahari<sup>17</sup>  
22

23 Anouk Borg,<sup>18</sup> Thanos Papadias<sup>18</sup>  
24

25 Kristy Kehoe,<sup>19</sup> Jeremy Cheong,<sup>19</sup> Isabella Davies,<sup>19</sup> Taisha Peplowska<sup>19</sup>  
26

27 James Ulrich<sup>20</sup> Mohammed Draz,<sup>20</sup> Barbora Krivankova,<sup>20</sup> Katy Homyer,<sup>20</sup> Vivienne Evans,<sup>20</sup> Steven  
28 Tominey,<sup>20</sup> Attika Chaudhary,<sup>20</sup> Sabrina Tengku,<sup>20</sup> Eilidh Middleton,<sup>20</sup> Sytske Lub,<sup>20</sup> Hassan Ismahel,<sup>20</sup>  
29 Michalina Wilinska,<sup>20</sup> Nicola Duncan,<sup>20</sup> Joanne Igoli,<sup>20</sup> Ritika Sandaram<sup>20</sup>  
30

31 Rebecca Hodnett,<sup>21</sup> Naadir Nazar,<sup>21</sup> Omar Ouaret Sorr,<sup>21</sup> Fatima Camp,<sup>21</sup> Tom Ferreira<sup>21</sup>  
32

33 Benjamin Fisher,<sup>22</sup> Devika Rajashekar,<sup>22</sup> Rachel Dumbrell,<sup>22</sup> Ananya Muthukumar,<sup>22</sup> Mohammad  
34 Anas,<sup>22</sup> Lilian Nwosu,<sup>22</sup> Ariadne Holmes<sup>22</sup>  
35

36 Ikenna Ogbu,<sup>23</sup> Madalina Pasca,<sup>23</sup> Veer Patel,<sup>23</sup> Mustafa Dashti,<sup>23</sup> Zeluleko Sibanda,<sup>23</sup> Erin Hwang,<sup>23</sup>  
37 Zara Adil<sup>23</sup>  
38

39 Samir Matloob,<sup>24</sup> Vanessa Chow<sup>24</sup>  
40

41 Rosa Sun,<sup>26</sup> Aparnu Vimal,<sup>26</sup> Talhah Chaudri,<sup>26</sup> Lauren Baldwin<sup>26</sup>  
42

43 Haritha Maripi,<sup>27</sup> Balint Borbas,<sup>27</sup> Mariyam Mujeeb<sup>27</sup>  
44  
45  
46  
47  
48  
49  
50  
51  
52  
53  
54  
55  
56  
57  
58  
59  
60



1  
2  
3  
4  
5  
6  
7  
8  
9  
10  
11  
12  
13  
14  
15  
16  
17  
18  
19  
20  
21  
22  
23  
24  
25  
26  
27  
28  
29  
30  
31  
32  
33  
34  
35  
36  
37  
38  
39  
40  
41  
42  
43  
44  
45  
46  
47  
48  
49  
50  
51  
52  
53  
54  
55  
56  
57  
58  
59  
60

For peer review only

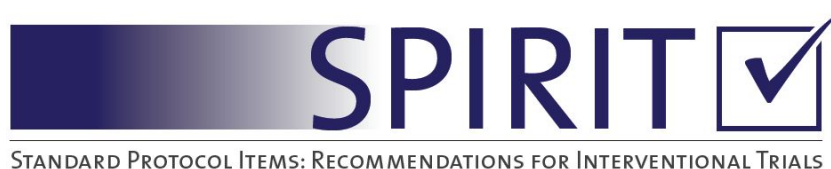

STANDARD PROTOCOL ITEMS: RECOMMENDATIONS FOR INTERVENTIONAL TRIALS

SPIRIT 2013 Checklist: Recommended items to address in a clinical trial protocol and related documents\*

| Section/item                      | Item No | Description                                                                                                                                                                                                                                                                              | Reported on page |
|-----------------------------------|---------|------------------------------------------------------------------------------------------------------------------------------------------------------------------------------------------------------------------------------------------------------------------------------------------|------------------|
| <b>Administrative information</b> |         |                                                                                                                                                                                                                                                                                          |                  |
| Title                             | 1       | Descriptive title identifying the study design, population, interventions, and, if applicable, trial acronym                                                                                                                                                                             | 1                |
| Trial registration                | 2a      | Trial identifier and registry name. If not yet registered, name of intended registry                                                                                                                                                                                                     | 3                |
|                                   | 2b      | All items from the World Health Organization Trial Registration Data Set                                                                                                                                                                                                                 | 3, 12            |
| Protocol version                  | 3       | Date and version identifier                                                                                                                                                                                                                                                              | 3                |
| Funding                           | 4       | Sources and types of financial, material, and other support                                                                                                                                                                                                                              | 12               |
| Roles and responsibilities        | 5a      | Names, affiliations, and roles of protocol contributors                                                                                                                                                                                                                                  | 12               |
|                                   | 5b      | Name and contact information for the trial sponsor                                                                                                                                                                                                                                       | 12               |
|                                   | 5c      | Role of study sponsor and funders, if any, in study design; collection, management, analysis, and interpretation of data; writing of the report; and the decision to submit the report for publication, including whether they will have ultimate authority over any of these activities | 12               |
|                                   | 5d      | Composition, roles, and responsibilities of the coordinating centre, steering committee, endpoint adjudication committee, data management team, and other individuals or groups overseeing the trial, if applicable (see Item 21a for data monitoring committee)                         | N/A              |
| <b>Introduction</b>               |         |                                                                                                                                                                                                                                                                                          |                  |
| Background and rationale          | 6a      | Description of research question and justification for undertaking the trial, including summary of relevant studies (published and unpublished) examining benefits and harms for each intervention                                                                                       | 4-5              |
|                                   | 6b      | Explanation for choice of comparators                                                                                                                                                                                                                                                    | N/A              |
| Objectives                        | 7       | Specific objectives or hypotheses                                                                                                                                                                                                                                                        | 5                |

|    |                                                           |     |                                                                                                                                                                                                                                                                                                                                                                                |
|----|-----------------------------------------------------------|-----|--------------------------------------------------------------------------------------------------------------------------------------------------------------------------------------------------------------------------------------------------------------------------------------------------------------------------------------------------------------------------------|
| 1  |                                                           |     |                                                                                                                                                                                                                                                                                                                                                                                |
| 2  | Trial design                                              | 8   | Description of trial design including type of trial (eg, parallel group, crossover, factorial, single group), allocation ratio, and framework (eg, superiority, equivalence, noninferiority, exploratory)                                                                                                                                                                      |
| 3  |                                                           |     |                                                                                                                                                                                                                                                                                                                                                                                |
| 4  |                                                           |     |                                                                                                                                                                                                                                                                                                                                                                                |
| 5  |                                                           |     |                                                                                                                                                                                                                                                                                                                                                                                |
| 6  |                                                           |     |                                                                                                                                                                                                                                                                                                                                                                                |
| 7  |                                                           |     |                                                                                                                                                                                                                                                                                                                                                                                |
| 8  | <b>Methods: Participants, interventions, and outcomes</b> |     |                                                                                                                                                                                                                                                                                                                                                                                |
| 9  |                                                           |     |                                                                                                                                                                                                                                                                                                                                                                                |
| 10 | Study setting                                             | 9   | Description of study settings (eg, community clinic, academic hospital) and list of countries where data will be collected. Reference to where list of study sites can be obtained                                                                                                                                                                                             |
| 11 |                                                           |     |                                                                                                                                                                                                                                                                                                                                                                                |
| 12 |                                                           |     |                                                                                                                                                                                                                                                                                                                                                                                |
| 13 |                                                           |     |                                                                                                                                                                                                                                                                                                                                                                                |
| 14 |                                                           |     |                                                                                                                                                                                                                                                                                                                                                                                |
| 15 | Eligibility criteria                                      | 10  | Inclusion and exclusion criteria for participants. If applicable, eligibility criteria for study centres and individuals who will perform the interventions (eg, surgeons, psychotherapists)                                                                                                                                                                                   |
| 16 |                                                           |     |                                                                                                                                                                                                                                                                                                                                                                                |
| 17 |                                                           |     |                                                                                                                                                                                                                                                                                                                                                                                |
| 18 |                                                           |     |                                                                                                                                                                                                                                                                                                                                                                                |
| 19 | Interventions                                             | 11a | Interventions for each group with sufficient detail to allow replication, including how and when they will be administered                                                                                                                                                                                                                                                     |
| 20 |                                                           |     |                                                                                                                                                                                                                                                                                                                                                                                |
| 21 |                                                           |     |                                                                                                                                                                                                                                                                                                                                                                                |
| 22 |                                                           | 11b | Criteria for discontinuing or modifying allocated interventions for a given trial participant (eg, drug dose change in response to harms, participant request, or improving/worsening disease)                                                                                                                                                                                 |
| 23 |                                                           |     |                                                                                                                                                                                                                                                                                                                                                                                |
| 24 |                                                           |     |                                                                                                                                                                                                                                                                                                                                                                                |
| 25 |                                                           |     |                                                                                                                                                                                                                                                                                                                                                                                |
| 26 |                                                           |     |                                                                                                                                                                                                                                                                                                                                                                                |
| 27 |                                                           |     |                                                                                                                                                                                                                                                                                                                                                                                |
| 28 |                                                           | 11c | Strategies to improve adherence to intervention protocols, and any procedures for monitoring adherence (eg, drug tablet return, laboratory tests)                                                                                                                                                                                                                              |
| 29 |                                                           |     |                                                                                                                                                                                                                                                                                                                                                                                |
| 30 |                                                           |     |                                                                                                                                                                                                                                                                                                                                                                                |
| 31 |                                                           |     |                                                                                                                                                                                                                                                                                                                                                                                |
| 32 |                                                           | 11d | Relevant concomitant care and interventions that are permitted or prohibited during the trial                                                                                                                                                                                                                                                                                  |
| 33 |                                                           |     |                                                                                                                                                                                                                                                                                                                                                                                |
| 34 |                                                           |     |                                                                                                                                                                                                                                                                                                                                                                                |
| 35 |                                                           |     |                                                                                                                                                                                                                                                                                                                                                                                |
| 36 | Outcomes                                                  | 12  | Primary, secondary, and other outcomes, including the specific measurement variable (eg, systolic blood pressure), analysis metric (eg, change from baseline, final value, time to event), method of aggregation (eg, median, proportion), and time point for each outcome. Explanation of the clinical relevance of chosen efficacy and harm outcomes is strongly recommended |
| 37 |                                                           |     |                                                                                                                                                                                                                                                                                                                                                                                |
| 38 |                                                           |     |                                                                                                                                                                                                                                                                                                                                                                                |
| 39 |                                                           |     |                                                                                                                                                                                                                                                                                                                                                                                |
| 40 |                                                           |     |                                                                                                                                                                                                                                                                                                                                                                                |
| 41 |                                                           |     |                                                                                                                                                                                                                                                                                                                                                                                |
| 42 |                                                           |     |                                                                                                                                                                                                                                                                                                                                                                                |
| 43 |                                                           |     |                                                                                                                                                                                                                                                                                                                                                                                |
| 44 |                                                           |     |                                                                                                                                                                                                                                                                                                                                                                                |
| 45 | Participant timeline                                      | 13  | Time schedule of enrolment, interventions (including any run-ins and washouts), assessments, and visits for participants. A schematic diagram is highly recommended (see Figure)                                                                                                                                                                                               |
| 46 |                                                           |     |                                                                                                                                                                                                                                                                                                                                                                                |
| 47 |                                                           |     |                                                                                                                                                                                                                                                                                                                                                                                |
| 48 |                                                           |     |                                                                                                                                                                                                                                                                                                                                                                                |
| 49 |                                                           |     |                                                                                                                                                                                                                                                                                                                                                                                |
| 50 | Sample size                                               | 14  | Estimated number of participants needed to achieve study objectives and how it was determined, including clinical and statistical assumptions supporting any sample size calculations                                                                                                                                                                                          |
| 51 |                                                           |     |                                                                                                                                                                                                                                                                                                                                                                                |
| 52 |                                                           |     |                                                                                                                                                                                                                                                                                                                                                                                |
| 53 |                                                           |     |                                                                                                                                                                                                                                                                                                                                                                                |
| 54 |                                                           |     |                                                                                                                                                                                                                                                                                                                                                                                |
| 55 | Recruitment                                               | 15  | Strategies for achieving adequate participant enrolment to reach target sample size                                                                                                                                                                                                                                                                                            |
| 56 |                                                           |     |                                                                                                                                                                                                                                                                                                                                                                                |
| 57 |                                                           |     |                                                                                                                                                                                                                                                                                                                                                                                |
| 58 |                                                           |     |                                                                                                                                                                                                                                                                                                                                                                                |
| 59 |                                                           |     |                                                                                                                                                                                                                                                                                                                                                                                |
| 60 |                                                           |     |                                                                                                                                                                                                                                                                                                                                                                                |

1  
2  
3  
4  
5  
6  
7  
8  
9  
10  
11  
12  
13  
14  
15  
16  
17  
18  
19  
20  
21  
22  
23  
24  
25  
26  
27  
28  
29  
30  
31  
32  
33  
34  
35  
36  
37  
38  
39  
40  
41  
42  
43  
44  
45  
46  
47  
48  
49  
50  
51  
52  
53  
54  
55  
56  
57  
58  
59  
60

### Methods: Assignment of interventions (for controlled trials)

#### Allocation:

|                                  |     |                                                                                                                                                                                                                                                                                                                                                          |     |
|----------------------------------|-----|----------------------------------------------------------------------------------------------------------------------------------------------------------------------------------------------------------------------------------------------------------------------------------------------------------------------------------------------------------|-----|
| Sequence generation              | 16a | Method of generating the allocation sequence (eg, computer-generated random numbers), and list of any factors for stratification. To reduce predictability of a random sequence, details of any planned restriction (eg, blocking) should be provided in a separate document that is unavailable to those who enrol participants or assign interventions | N/A |
| Allocation concealment mechanism | 16b | Mechanism of implementing the allocation sequence (eg, central telephone; sequentially numbered, opaque, sealed envelopes), describing any steps to conceal the sequence until interventions are assigned                                                                                                                                                | N/A |
| Implementation                   | 16c | Who will generate the allocation sequence, who will enrol participants, and who will assign participants to interventions                                                                                                                                                                                                                                | N/A |
| Blinding (masking)               | 17a | Who will be blinded after assignment to interventions (eg, trial participants, care providers, outcome assessors, data analysts), and how                                                                                                                                                                                                                | N/A |
|                                  | 17b | If blinded, circumstances under which unblinding is permissible, and procedure for revealing a participant's allocated intervention during the trial                                                                                                                                                                                                     | N/A |

### Methods: Data collection, management, and analysis

|                         |     |                                                                                                                                                                                                                                                                                                                                                                                                              |     |
|-------------------------|-----|--------------------------------------------------------------------------------------------------------------------------------------------------------------------------------------------------------------------------------------------------------------------------------------------------------------------------------------------------------------------------------------------------------------|-----|
| Data collection methods | 18a | Plans for assessment and collection of outcome, baseline, and other trial data, including any related processes to promote data quality (eg, duplicate measurements, training of assessors) and a description of study instruments (eg, questionnaires, laboratory tests) along with their reliability and validity, if known. Reference to where data collection forms can be found, if not in the protocol | 5-7 |
|                         | 18b | Plans to promote participant retention and complete follow-up, including list of any outcome data to be collected for participants who discontinue or deviate from intervention protocols                                                                                                                                                                                                                    | N/A |
| Data management         | 19  | Plans for data entry, coding, security, and storage, including any related processes to promote data quality (eg, double data entry; range checks for data values). Reference to where details of data management procedures can be found, if not in the protocol                                                                                                                                            | 7   |
| Statistical methods     | 20a | Statistical methods for analysing primary and secondary outcomes. Reference to where other details of the statistical analysis plan can be found, if not in the protocol                                                                                                                                                                                                                                     | 8-9 |

|    |                                 |                                                             |                                                                  |
|----|---------------------------------|-------------------------------------------------------------|------------------------------------------------------------------|
| 1  |                                 |                                                             |                                                                  |
| 2  | 20b                             | Methods for any additional analyses (eg, subgroup and       | N/A                                                              |
| 3  |                                 | adjusted analyses)                                          |                                                                  |
| 4  |                                 |                                                             |                                                                  |
| 5  | 20c                             | Definition of analysis population relating to protocol non- | 8-9                                                              |
| 6  |                                 | adherence (eg, as randomised analysis), and any statistical |                                                                  |
| 7  |                                 | methods to handle missing data (eg, multiple imputation)    |                                                                  |
| 8  |                                 |                                                             |                                                                  |
| 9  | <b>Methods: Monitoring</b>      |                                                             |                                                                  |
| 10 |                                 |                                                             |                                                                  |
| 11 | Data monitoring                 | 21a                                                         | Composition of data monitoring committee (DMC); summary          |
| 12 |                                 |                                                             | of its role and reporting structure; statement of whether it is  |
| 13 |                                 |                                                             | independent from the sponsor and competing interests; and        |
| 14 |                                 |                                                             | reference to where further details about its charter can be      |
| 15 |                                 |                                                             | found, if not in the protocol. Alternatively, an explanation of  |
| 16 |                                 |                                                             | why a DMC is not needed                                          |
| 17 |                                 |                                                             |                                                                  |
| 18 |                                 |                                                             |                                                                  |
| 19 |                                 | 21b                                                         | Description of any interim analyses and stopping guidelines,     |
| 20 |                                 |                                                             | including who will have access to these interim results and      |
| 21 |                                 |                                                             | make the final decision to terminate the trial                   |
| 22 |                                 |                                                             |                                                                  |
| 23 |                                 |                                                             |                                                                  |
| 24 | Harms                           | 22                                                          | Plans for collecting, assessing, reporting, and managing         |
| 25 |                                 |                                                             | solicited and spontaneously reported adverse events and          |
| 26 |                                 |                                                             | other unintended effects of trial interventions or trial conduct |
| 27 |                                 |                                                             |                                                                  |
| 28 |                                 |                                                             |                                                                  |
| 29 | Auditing                        | 23                                                          | Frequency and procedures for auditing trial conduct, if any,     |
| 30 |                                 |                                                             | and whether the process will be independent from                 |
| 31 |                                 |                                                             | investigators and the sponsor                                    |
| 32 |                                 |                                                             |                                                                  |
| 33 | <b>Ethics and dissemination</b> |                                                             |                                                                  |
| 34 |                                 |                                                             |                                                                  |
| 35 | Research ethics                 | 24                                                          | Plans for seeking research ethics committee/institutional        |
| 36 | approval                        |                                                             | review board (REC/IRB) approval                                  |
| 37 |                                 |                                                             |                                                                  |
| 38 |                                 |                                                             |                                                                  |
| 39 | Protocol                        | 25                                                          | Plans for communicating important protocol modifications (eg,    |
| 40 | amendments                      |                                                             | changes to eligibility criteria, outcomes, analyses) to relevant |
| 41 |                                 |                                                             | parties (eg, investigators, REC/IRBs, trial participants, trial  |
| 42 |                                 |                                                             | registries, journals, regulators)                                |
| 43 |                                 |                                                             |                                                                  |
| 44 |                                 |                                                             |                                                                  |
| 45 | Consent or assent               | 26a                                                         | Who will obtain informed consent or assent from potential trial  |
| 46 |                                 |                                                             | participants or authorised surrogates, and how (see Item 32)     |
| 47 |                                 |                                                             |                                                                  |
| 48 |                                 | 26b                                                         | Additional consent provisions for collection and use of          |
| 49 |                                 |                                                             | participant data and biological specimens in ancillary studies,  |
| 50 |                                 |                                                             | if applicable                                                    |
| 51 |                                 |                                                             |                                                                  |
| 52 | Confidentiality                 | 27                                                          | How personal information about potential and enrolled            |
| 53 |                                 |                                                             | participants will be collected, shared, and maintained in order  |
| 54 |                                 |                                                             | to protect confidentiality before, during, and after the trial   |
| 55 |                                 |                                                             |                                                                  |
| 56 |                                 |                                                             |                                                                  |
| 57 | Declaration of                  | 28                                                          | Financial and other competing interests for principal            |
| 58 | interests                       |                                                             | investigators for the overall trial and each study site          |
| 59 |                                 |                                                             |                                                                  |
| 60 |                                 |                                                             |                                                                  |

|    |                               |     |                                                                                                                                                                                                                                                                                     |     |
|----|-------------------------------|-----|-------------------------------------------------------------------------------------------------------------------------------------------------------------------------------------------------------------------------------------------------------------------------------------|-----|
| 1  |                               |     |                                                                                                                                                                                                                                                                                     |     |
| 2  | Access to data                | 29  | Statement of who will have access to the final trial dataset, and disclosure of contractual agreements that limit such access for investigators                                                                                                                                     | 10  |
| 3  |                               |     |                                                                                                                                                                                                                                                                                     |     |
| 4  |                               |     |                                                                                                                                                                                                                                                                                     |     |
| 5  |                               |     |                                                                                                                                                                                                                                                                                     |     |
| 6  | Ancillary and post-trial care | 30  | Provisions, if any, for ancillary and post-trial care, and for compensation to those who suffer harm from trial participation                                                                                                                                                       | N/A |
| 7  |                               |     |                                                                                                                                                                                                                                                                                     |     |
| 8  |                               |     |                                                                                                                                                                                                                                                                                     |     |
| 9  |                               |     |                                                                                                                                                                                                                                                                                     |     |
| 10 | Dissemination policy          | 31a | Plans for investigators and sponsor to communicate trial results to participants, healthcare professionals, the public, and other relevant groups (eg, via publication, reporting in results databases, or other data sharing arrangements), including any publication restrictions | 10  |
| 11 |                               |     |                                                                                                                                                                                                                                                                                     |     |
| 12 |                               |     |                                                                                                                                                                                                                                                                                     |     |
| 13 |                               |     |                                                                                                                                                                                                                                                                                     |     |
| 14 |                               |     |                                                                                                                                                                                                                                                                                     |     |
| 15 |                               |     |                                                                                                                                                                                                                                                                                     |     |
| 16 |                               | 31b | Authorship eligibility guidelines and any intended use of professional writers                                                                                                                                                                                                      | 10  |
| 17 |                               |     |                                                                                                                                                                                                                                                                                     |     |
| 18 |                               |     |                                                                                                                                                                                                                                                                                     |     |
| 19 |                               |     |                                                                                                                                                                                                                                                                                     |     |
| 20 |                               | 31c | Plans, if any, for granting public access to the full protocol, participant-level dataset, and statistical code                                                                                                                                                                     | N/A |
| 21 |                               |     |                                                                                                                                                                                                                                                                                     |     |
| 22 |                               |     |                                                                                                                                                                                                                                                                                     |     |
| 23 | <b>Appendices</b>             |     |                                                                                                                                                                                                                                                                                     |     |
| 24 |                               |     |                                                                                                                                                                                                                                                                                     |     |
| 25 | Informed consent materials    | 32  | Model consent form and other related documentation given to participants and authorised surrogates                                                                                                                                                                                  | N/A |
| 26 |                               |     |                                                                                                                                                                                                                                                                                     |     |
| 27 |                               |     |                                                                                                                                                                                                                                                                                     |     |
| 28 |                               |     |                                                                                                                                                                                                                                                                                     |     |
| 29 | Biological specimens          | 33  | Plans for collection, laboratory evaluation, and storage of biological specimens for genetic or molecular analysis in the current trial and for future use in ancillary studies, if applicable                                                                                      | N/A |
| 30 |                               |     |                                                                                                                                                                                                                                                                                     |     |
| 31 |                               |     |                                                                                                                                                                                                                                                                                     |     |
| 32 |                               |     |                                                                                                                                                                                                                                                                                     |     |
| 33 |                               |     |                                                                                                                                                                                                                                                                                     |     |

\*It is strongly recommended that this checklist be read in conjunction with the SPIRIT 2013 Explanation & Elaboration for important clarification on the items. Amendments to the protocol should be tracked and dated. The SPIRIT checklist is copyrighted by the SPIRIT Group under the Creative Commons "[Attribution-NonCommercial-NoDerivs 3.0 Unported](https://creativecommons.org/licenses/by-nc-nd/3.0/)" license.

# BMJ Open

## Risk Of Aneurysm Rupture (ROAR) study: protocol for a long-term, longitudinal, UK multicentre study of unruptured intracranial aneurysms

|                               |                                                                                                                                                                                                                                                                                                                                                                                                                                                                                                                                                                                                                                                                                                                                                                                                                                                                                                                                                                                                                                                                                                                                                                                                                                                                                                                                                                                                                                                                                                                                                                                                                                                                                                                                                                                                                                                                                                                                                                                                                                            |
|-------------------------------|--------------------------------------------------------------------------------------------------------------------------------------------------------------------------------------------------------------------------------------------------------------------------------------------------------------------------------------------------------------------------------------------------------------------------------------------------------------------------------------------------------------------------------------------------------------------------------------------------------------------------------------------------------------------------------------------------------------------------------------------------------------------------------------------------------------------------------------------------------------------------------------------------------------------------------------------------------------------------------------------------------------------------------------------------------------------------------------------------------------------------------------------------------------------------------------------------------------------------------------------------------------------------------------------------------------------------------------------------------------------------------------------------------------------------------------------------------------------------------------------------------------------------------------------------------------------------------------------------------------------------------------------------------------------------------------------------------------------------------------------------------------------------------------------------------------------------------------------------------------------------------------------------------------------------------------------------------------------------------------------------------------------------------------------|
| Journal:                      | <i>BMJ Open</i>                                                                                                                                                                                                                                                                                                                                                                                                                                                                                                                                                                                                                                                                                                                                                                                                                                                                                                                                                                                                                                                                                                                                                                                                                                                                                                                                                                                                                                                                                                                                                                                                                                                                                                                                                                                                                                                                                                                                                                                                                            |
| Manuscript ID                 | bmjopen-2022-070504.R1                                                                                                                                                                                                                                                                                                                                                                                                                                                                                                                                                                                                                                                                                                                                                                                                                                                                                                                                                                                                                                                                                                                                                                                                                                                                                                                                                                                                                                                                                                                                                                                                                                                                                                                                                                                                                                                                                                                                                                                                                     |
| Article Type:                 | Protocol                                                                                                                                                                                                                                                                                                                                                                                                                                                                                                                                                                                                                                                                                                                                                                                                                                                                                                                                                                                                                                                                                                                                                                                                                                                                                                                                                                                                                                                                                                                                                                                                                                                                                                                                                                                                                                                                                                                                                                                                                                   |
| Date Submitted by the Author: | 24-Feb-2023                                                                                                                                                                                                                                                                                                                                                                                                                                                                                                                                                                                                                                                                                                                                                                                                                                                                                                                                                                                                                                                                                                                                                                                                                                                                                                                                                                                                                                                                                                                                                                                                                                                                                                                                                                                                                                                                                                                                                                                                                                |
| Complete List of Authors:     | <p>Hall, Samuel; University Hospital Southampton NHS Foundation Trust, Department of Neurosurgery</p> <p>Birks, Jacqueline; University of Oxford, Centre for Statistics in Medicine</p> <p>Anderson, Ian; The Leeds Teaching Hospitals NHS Trust, Department of Neurosurgery</p> <p>Bacon, Andrew; Sheffield Teaching Hospitals NHS Foundation Trust, Department of Neurosurgery</p> <p>Brennan, Paul; Western General Hospital, Department of Clinical Neurosciences</p> <p>Bennett, David; NHS Tayside, Department of Neurosurgery</p> <p>Chavredakis, Emmanuel; Walton Centre NHS Foundation Trust, Department of Neurosurgery</p> <p>Critchley, Giles; University Hospitals Sussex NHS Foundation Trust, Department of Neurosurgery</p> <p>Dow, Graham; Nottingham University Hospitals NHS Trust, Department of Neurosurgery</p> <p>Downer, Jonathan; Western General Hospital, Department of Clinical Neurosciences</p> <p>Galea, James; University Hospital of Wales Healthcare NHS Trust, Neurosurgical Department</p> <p>Grover, Patrick; University College London Hospitals NHS Foundation Trust, National Hospital for Neurology and Neurosurgery</p> <p>Gurusinghe, Nihal; Lancashire Teaching Hospitals NHS Foundation Trust, Department of Neurosurgery</p> <p>Helmy, Adel; Cambridge University Hospitals NHS Foundation Trust, Department of neurosurgery</p> <p>Kounin, Gueorgui; Hull University Teaching Hospitals NHS Trust, Department of Neurosurgery</p> <p>Mukerji, Nitin; South Tees Hospitals NHS Foundation Trust, Department of Neurosurgery</p> <p>Patel, Hiren; Northern Care Alliance NHS Foundation Trust, Department of Neurosurgery</p> <p>Patel, Jash; Oxford University Hospitals NHS Foundation Trust, Department of Neurosurgery</p> <p>Ross, Nicholas; Newcastle Hospitals NHS Foundation Trust, Department of Neurosurgery</p> <p>St George, Jerome; NHS Greater Glasgow and Clyde, Institute of Neurological Sciences</p> <p>Teo, Mario; North Bristol NHS Trust, Department of Neurosurgery</p> |

|                                 |                                                                                                                                                                                                                                                                                                                                                                                                                                                                                                                                                                                                                                                                                                                                                                                                                                                                              |
|---------------------------------|------------------------------------------------------------------------------------------------------------------------------------------------------------------------------------------------------------------------------------------------------------------------------------------------------------------------------------------------------------------------------------------------------------------------------------------------------------------------------------------------------------------------------------------------------------------------------------------------------------------------------------------------------------------------------------------------------------------------------------------------------------------------------------------------------------------------------------------------------------------------------|
|                                 | Tolias, Christos; King's College Hospital NHS Foundation Trust, Neurosurgery<br>Tzerakis, Nikolaos; University Hospitals of North Midlands NHS Trust, Department of Neurosurgery<br>Uff, Christopher; Barts Health NHS Trust, Department of Neurosurgery<br>van Beijum, Janneke; University Hospital of Wales Healthcare NHS Trust, Neurosurgical department<br>Veighey, Kristin; University Hospital Southampton NHS Foundation Trust, Department of Renal Medicine<br>White, Edward; University Hospitals Birmingham NHS Foundation Trust, Department of Neurosurgery<br>Whitfield, Peter; University Hospitals Plymouth NHS Trust, South West Neurosurgery Centre<br>Bulters, Diederik ; University Hospital Southampton NHS Foundation Trust, Department of Neurosurgery<br>ROAR Investigators, ROAR Investigators; University Hospital Southampton NHS Foundation Trust |
| <b>Primary Subject Heading</b>: | Neurology                                                                                                                                                                                                                                                                                                                                                                                                                                                                                                                                                                                                                                                                                                                                                                                                                                                                    |
| Secondary Subject Heading:      | Evidence based practice, Surgery                                                                                                                                                                                                                                                                                                                                                                                                                                                                                                                                                                                                                                                                                                                                                                                                                                             |
| Keywords:                       | EPIDEMIOLOGY, Stroke < NEUROLOGY, NEUROSURGERY                                                                                                                                                                                                                                                                                                                                                                                                                                                                                                                                                                                                                                                                                                                                                                                                                               |
|                                 |                                                                                                                                                                                                                                                                                                                                                                                                                                                                                                                                                                                                                                                                                                                                                                                                                                                                              |

SCHOLARONE™  
Manuscripts



**Risk Of Aneurysm Rupture (ROAR) study: protocol for a long-term, longitudinal, UK multicentre study of unruptured intracranial aneurysms**

Samuel Hall<sup>1</sup>, Jacqueline Birks<sup>2</sup>, Ian Anderson,<sup>3</sup> Andrew Bacon,<sup>4</sup> Paul Brennan,<sup>5</sup> David Bennett,<sup>6</sup> Emmanuel Chavredakis,<sup>7</sup> Giles Critchley,<sup>8</sup> Graham Dow,<sup>9</sup> Jonny Downer,<sup>5</sup> James Galea,<sup>10</sup> Patrick Grover,<sup>11</sup> Nihal Gurusinghe,<sup>12</sup> Adel Helmy,<sup>13</sup> Gueorgui Kounin,<sup>14</sup> Nitin Mukerji,<sup>16</sup> Hiren Patel,<sup>17</sup> Jash Patel,<sup>18</sup> Nicholas Ross,<sup>19</sup> Jerome St George,<sup>20</sup> Mario Teo,<sup>21</sup> Christos Tolia,<sup>22</sup> Nikolaos Tzerakis,<sup>23</sup> Christopher Uff,<sup>24</sup> Janneke van Beijum,<sup>10</sup> Kristin Veighey,<sup>25</sup> Edward White,<sup>26</sup> Peter Whitfield,<sup>27</sup> Diederik Bulters<sup>1</sup> ROAR Investigators, ROAR Investigators

<sup>1</sup> Department of Neurosurgery, University Hospitals Southampton NHS Foundation Trust, Southampton, UK

<sup>2</sup> Centre for Statistics in Medicine, Medical Sciences Division, University of Oxford, Oxford, UK

<sup>3</sup> Department of Neurosurgery, The Leeds Teaching Hospitals NHS Trust, Leeds, UK

<sup>4</sup> Sheffield Teaching Hospitals NHS Foundation Trust, Sheffield, UK

<sup>5</sup> Department of Clinical Neurosciences, NHS Lothian, Edinburgh, UK

<sup>6</sup> Department of Neurosurgery, NHS Tayside, Dundee, UK

<sup>7</sup> Department of Neurosurgery, Walton Centre NHS Foundation Trust, Liverpool, UK

<sup>8</sup> Department of Neurosurgery, University Hospitals Sussex NHS Foundation Trust, Brighton, UK

<sup>9</sup> Department of Neurosurgery, Nottingham University Hospitals NHS Trust, Nottingham, UK

<sup>10</sup> Neurosurgical Department, Floor 4, Corridor B, University Hospital Wales, Heath Park, Cardiff, UK

<sup>11</sup> National Hospital for Neurology and Neurosurgery, University College London Hospitals NHS Foundation Trust, London, UK

<sup>12</sup> Department of Neurosurgery, Lancashire Teaching Hospitals NHS Foundation Trust, Preston, UK

<sup>13</sup> Department of Neurosurgery, Cambridge University Hospitals NHS Foundation Trust, Cambridge, UK

<sup>14</sup> Department of Neurosurgery, Hull University Teaching Hospitals NHS Trust, Hull, UK

<sup>15</sup> Department of Radiology, Hull University Teaching Hospitals NHS Trust, Hull, UK

<sup>16</sup> Department of Neurosurgery, South Tees Hospitals NHS Foundation Trust, Middlesbrough, UK

<sup>17</sup> Department of Neurosurgery, Northern Care Alliance NHS Foundation Trust, Salford, UK

<sup>18</sup> Department of Neurosurgery, Oxford University Hospitals NHS Foundation Trust, Oxford, UK

<sup>19</sup> Department of Neurosurgery, Newcastle Hospitals NHS Foundation Trust, Newcastle, UK

<sup>20</sup> Institute of Neurological Sciences, NHS Greater Glasgow and Clyde, Glasgow, UK

<sup>21</sup> Department of Neurosurgery, North Bristol NHS Trust, Bristol, UK

- 1  
2  
3     <sup>22</sup> Department of Neurosurgery, King's College Hospital NHS Foundation Trust, London, UK  
4  
5     <sup>23</sup> Department of Neurosurgery, University Hospitals of North Midlands NHS Trust, Stoke-on-Trent,  
6     UK  
7  
8     <sup>24</sup> Department of Neurosurgery, Barts Health NHS Trust, London, UK  
9  
10    <sup>25</sup> Department of Renal Medicine, University Hospitals Portsmouth NHS Trust, Portsmouth, UK  
11  
12    <sup>26</sup> Department of Neurosurgery, University Hospitals Birmingham NHS Foundation Trust,  
13    Birmingham, UK  
14  
15    <sup>27</sup> South West Neurosurgery Centre, University Hospitals Plymouth NHS Trust, Plymouth, UK  
16  
17  
18

19    Correspondence to:

20    Mr Diederik Bulters  
21    Department of neurosurgery  
22    Southampton General Hospital  
23    Tremona Road  
24    Southampton  
25    SO16 6YD  
26    UK  
27    [dbulters@nhs.net](mailto:dbulters@nhs.net)  
28    Tel: 0044 2381 205311  
29  
30  
31  
32  
33  
34  
35  
36  
37  
38  
39  
40  
41  
42  
43  
44  
45  
46  
47  
48  
49  
50  
51  
52  
53  
54  
55  
56  
57  
58  
59  
60

## Abstract

### Introduction

Unruptured intracranial aneurysms (UIA) are common in the adult population, but only a relatively small proportion will rupture. It is therefore essential to have accurate estimates of rupture risk to target treatment towards those who stand to benefit and avoid exposing patients to the risks of unnecessary treatment. The best available UIA natural history data is the PHASES study. However, this has never been validated and given the known heterogeneity in the populations, methods and biases of the constituent studies, there is a need to do so. There are also many potential predictors not considered in PHASES that require evaluation, and the estimated rupture risk is largely based on short term follow up (mostly 1 year). This study's aims are: 1) test the accuracy of PHASES in a UK population, 2) evaluate additional predictors of rupture and 3) assess long-term UIA rupture rates.

### Methods and analysis

The Risk Of Aneurysm Rupture (ROAR) study is a longitudinal multicentre study that will identify patients with known UIA seen in neurosurgery units. Patients will have baseline demographics and aneurysm characteristics collected by their neurosurgery unit and then a single aggregated national cohort will be linked to databases of hospital admissions and deaths to identify all patients who may have subsequently suffered a subarachnoid haemorrhage. All matched admissions and deaths will be checked against medical records to confirm the diagnosis of aneurysmal subarachnoid haemorrhage. The target sample size is 20,000 patients. The primary outcome will be aneurysm rupture resulting in hospital admission or death. Cox regression models will be built to test each of the study's aims.

### Ethics and dissemination

Ethical approval has been given by South Central Hampshire A REC (21SC0064) and Confidentiality Advisory Group support (21CAG0033) provided under Section 251 of the NHS Act 2006. The results will be disseminated in peer reviewed journals.

### Study registration

ISRCTN17658526 (date of registration: 21/4/2021).

**Protocol version:** 2.1 12<sup>th</sup> July 2022

**Keywords:** intracranial aneurysm, aneurysm cerebral, rupture risk, aneurysmal subarachnoid haemorrhage, natural history, survival analysis, validation study.

### Strengths and limitations of this study

- The unruptured intracranial aneurysms (UIA) treatment rate is lower in the UK than in many other developed countries, which reduces selection bias and allows observation of the true UIA natural history.

- The large cohort size will allow inclusion of more covariates in prediction models than has been possible in previous studies including rare, but salient, patient groups such as those with Autosomal Dominant Polycystic Kidney Disease (ADPKD).
- The UK has uniform medical coverage and given virtually all patients who suffer subarachnoid haemorrhage seek medical help, the strategy to use national databases for hospital admissions and deaths in a defined population provides a robust method for identification of outcome events with minimal loss to follow up.
- This design makes the ROAR study not only an order of magnitude larger than previous natural history studies but allows for repeated follow up and generation of true long-term rupture risk.
- Identifying rupture events from hospital admissions databases is reliant on diagnosis coding accuracy; this limitation has been mitigated by searching a broad range of possible codes for intra-cranial haemorrhagic events and subsequent diagnosis verification against original imaging studies.

## Introduction

Unruptured intracranial aneurysms (UIA) are common in the general population with an estimated prevalence of 2.3-3.2%.<sup>1,2</sup> Aneurysm rupture resulting in subarachnoid haemorrhage is much less common with an annual incidence of 9 per 100,000 of the population.<sup>3</sup> It is estimated that 1.4% of UIA rupture per year.<sup>4</sup> Subarachnoid haemorrhage is a serious complication of UIA with a mortality rate of up to 67% and half of the survivors are left disabled.<sup>5</sup> Unruptured intracranial aneurysms can be prophylactically treated to prevent rupture, however these procedures carry at least a 5% risk of complications.<sup>6</sup> In the absence of randomised controlled trial data, the decision on proceeding to prophylactic treatment is dependent on natural history data. Decisions regarding whether to follow up untreated patients radiologically also depend on our understanding of this data.

The first natural history study, and the most applicable to the UK population, was the International Study of Unruptured Intracranial Aneurysms (ISUIA).<sup>7</sup> However, concerns over the data are well documented,<sup>8</sup> and the generalisability of the results may be undermined by selection bias resulting from a high treatment rate of 71%. Five further natural history studies have been conducted,<sup>9-13</sup> all in different populations with different selection biases and different periods of follow up, and yielding different results. For example, Juvela *et al.*<sup>9</sup> reported rupture rates of 26% of UIA<7mm over 30 years compared to 0% in similar aneurysms extrapolated from ISUIA. This difference may reflect a higher risk in the Finnish population or difference in study methodology – it is not known which.

These six studies were combined in an individual patient level meta-analysis as the PHASES score which provides an estimate for 5 year rupture risk.<sup>4</sup> The PHASES score is the best available evidence for UIA rupture risk. However, it has never been externally validated, and particularly given the heterogeneity in the underlying studies, there is an urgent need to do so.

Furthermore, PHASES was limited to the risk factors available for analysis from the underlying studies. There are many more patient and aneurysm features which have been shown to be associated with rupture or that may be hypothesised to predispose to rupture. These range from

1  
2  
3 common modifiable variables like smoking, to rarer non-modifiable ones like family history and  
4 ADPKD.  
5  
6  
7

8 One of the main shortfalls of PHASES is that, with one exception, the constituent studies are based  
9 on short lengths of follow-up, with the majority of patients followed up just 1 year, which has been  
10 used to generate 5 year risks in PHASES. Clinicians further extrapolate PHASES to patient's lifetime  
11 risk which all makes the large assumption that risk does not change over time. Moreover, even if the  
12 bleeding risk remains constant over time, any seemingly small inaccuracies in short term estimates  
13 can become very significant when extrapolated over many decades.  
14  
15  
16  
17

18 We therefore designed a large multicentre longitudinal study of patients with UIAs to address these  
19 concerns.  
20  
21  
22

## 23 **Methods and analysis**

### 24 *Objectives*

25 This study has three objectives:  
26  
27

- 28 1) To measure the accuracy of the PHASES score at predicting UIA rupture rates in the UK  
29 population.
- 30 2) To develop a new, more personalised, predictive model for aneurysm rupture incorporating  
31 additional co-variates thought to influence risk.
- 32 3) To measure aneurysm rupture risk over time periods greater than 5 years.  
33  
34  
35  
36

### 37 *Study setting*

38 This is a multicentre study conducted at up to 30 tertiary neurosurgery units in the United Kingdom.  
39 Patients will be identified by the neurosurgery unit who diagnosed their unruptured intracranial  
40 aneurysm. Each unit will collect their baseline data on patients' clinical and aneurysm characteristics  
41 from the time of diagnosis. Central searches of hospital admissions databases, and data analysis, will  
42 be performed by the co-ordinating team at University Hospital Southampton NHS Foundation Trust  
43 and the University of Oxford. A separate cohort enriched in patients with autosomal dominant  
44 polycystic kidney disease will be established using similar methodology, from up to 70 renal units in  
45 the United Kingdom.  
46  
47  
48  
49  
50

### 51 *Study design*

52 The Risk Of Aneurysm Rupture (ROAR) study is a longitudinal study that uses a hybrid design of  
53 patient identification at regional neurosurgical units and prospectively collected national hospital  
54 admissions databases for outcome events. The study will establish a cohort of patients with a UIA  
55 and measure how many subsequently ruptured. This observed rupture rate can be compared to a  
56 rate estimated by the PHASES score to determine its accuracy.  
57  
58  
59  
60

1  
2  
3 Each neurosurgery unit in the UK will be invited to search their medical records for patients  
4 diagnosed with a UIA. This search method will be tailored by the individual neurosurgery unit based  
5 on what records they keep, but search strategies may include: Multi-Disciplinary Team (MDT)  
6 meeting logs, radiology reports or electronic patient records. The search strategy will be predefined  
7 by individual units dependent on their record systems. The maximum date range for identifying  
8 patients is documents dated 1/1/2006-31/12/2020, however, this period may be shorter for each  
9 unit depending on availability of records. Whatever date range is chosen by the unit it will be pre-  
10 defined and if the patient's UIA was newly diagnosed during this period it will be classed as *new* and  
11 those who were diagnosed before this period but identified from a document during the aneurysm  
12 follow-up will be classed as *follow-up*, and their recruitment date recorded as the date of the  
13 document from which they were identified. This will minimise the prevalence-incidence (Neyman)<sup>14</sup>  
14 selection bias created by identifying patients diagnosed before the unit's search period but who  
15 survive without rupture to make it into the search period whereas their counterparts diagnosed at  
16 the same time who rupture and die are not identified. It will also allow comparison of rupture risk of  
17 newly diagnosed aneurysms and those with known diagnoses. Baseline clinical characteristics and  
18 aneurysm characteristics will be collected as per the common data elements for UIA research.<sup>15</sup> All  
19 data collectors will undergo training in coding data elements delivered by the co-ordinating centre.  
20 Collecting baseline data from local medical records allows deeper phenotypic typing and higher data  
21 fidelity than using national admission databases.  
22  
23  
24  
25  
26  
27  
28

29 Patient identifiable details (name, date of birth, post code, NHS/CHI number) will be securely sent by  
30 each neurosurgery unit to the co-ordinating centre for consolidation and linkage to the national  
31 databases for hospital admissions. These databases are: Hospital Episode Statistics (HES), Patient  
32 Episode Database for Wales (PEDW) and Scottish Morbidity Database (SMD). These databases also  
33 link to the Civil Registrations - Death and National Registry Scotland for death records. Patients will  
34 be linked to hospital admissions based on ICD10 diagnosis codes for intracranial haemorrhages and  
35 OPCS4 codes for aneurysm occlusion treatments. These databases record every hospital admission  
36 in their respective country and thus using this as the outcome source, combined with death records,  
37 will allow identification of every aneurysmal subarachnoid haemorrhage (aSAH) regardless of  
38 whether they were managed in a neurosurgery unit, a district general hospital, migrated out of the  
39 region in which their UIA was diagnosed, or died in the community. The number of patients with  
40 aSAH who are not captured by this method, either because they do not present to hospital or  
41 emigrate out of the UK, is expected to be very small. Rupture rates can be adjusted based on  
42 national emigration rates.  
43  
44  
45  
46  
47

48 Patients will be censored if there is any occlusive treatment of the unruptured intracranial aneurysm  
49 or patient death. Occlusive treatment includes either microsurgical or endovascular techniques  
50 either partial or complete. If none of these censoring events are observed, then they will be  
51 censored on the day the cohort is submitted to the HES/PEDW/SMD databases.  
52  
53  
54

55 The ICD10 codes to be searched for rupture events have been selected in accordance with the UK  
56 Biobank stroke research and include: aneurysmal subarachnoid haemorrhage (I60.1-9), intra-  
57 cerebral haemorrhage (I61.0-9), traumatic subarachnoid haemorrhage (S06.6) and spontaneous  
58 subdural haemorrhage (I62.00-I62.02).<sup>16</sup> The use of codes beyond those for aneurysmal  
59  
60

1  
2  
3 subarachnoid haemorrhage will capture any hospital admissions for aneurysm rupture which have  
4 resulted in other forms of intracranial bleed or have been mis-coded.  
5  
6

7 It is expected that the use of codes beyond that for just aSAH will return many admissions not due to  
8 aneurysm rupture. The matched hospital admissions, and death records, will be returned to the co-  
9 ordinating unit who will in turn use pseudonymisation numbers to inform the respective local unit of  
10 their patient's admission for possible aneurysmal subarachnoid haemorrhage. The local unit will  
11 review the imaging studies, discharge summaries and death certificates for these admissions and  
12 confirm or refute the diagnosis. Statistical analysis will begin once the diagnosis for all of the  
13 matched admissions is confirmed.  
14  
15  
16

17  
18 The study is currently opening new sites and identifying patients for inclusion. The baseline data  
19 collection is planned to finish by 31/7/2023 and the results released no sooner than 31/7/2024. The  
20 study end date is currently 31/7/2034 to allow for repeated searching of hospital admissions  
21 databases in the future thereby further extending the follow-up period.  
22  
23  
24

### 25 *Eligibility criteria*

#### 26 Inclusion:

- 27 1. Age 18 years or older.
- 28 2. Intracranial, intradural, unruptured aneurysm.
- 29 3. Aneurysm confirmed on cranial angiogram (CTA/MRA/DSA).
- 30 4. Identification of UIA from records between 1<sup>st</sup> January 2006 - 31<sup>st</sup> December 2020.

#### 31 Exclusion:

- 32 1. Mycotic or vasculitic aneurysms.
- 33 2. Aneurysm diagnosed on CT or MRI alone.
- 34 3. AVM associated flow aneurysms.
- 35 4. Extradural aneurysms (e.g. intra-cavernous).
- 36 5. Aneurysms treated by either microsurgical or endovascular techniques before the search  
37 period.
- 38 6. Small lesions uncertain as to whether they are truly aneurysmal ("dilatation", "bulge",  
39 'Infundibulum").

### 40 *Outcomes*

- 41 • Primary endpoints

42 The primary endpoint is rupture of an untreated unruptured intracranial aneurysm at a timepoint at  
43 least one day following diagnosis. A rupture event is defined as either radiological evidence of  
44 aneurysmal subarachnoid haemorrhage in a distribution consistent with the aneurysm location, CSF  
45 spectrophotometry positive for xanthochromia per the local unit's reference range, or death  
46 certificate stating subarachnoid haemorrhage in either 1a-c.  
47  
48  
49  
50  
51  
52  
53  
54  
55  
56  
57  
58  
59  
60

- Secondary endpoints

The secondary endpoint is aneurysm growth on follow up imaging. Recruiting units will record if patients have undergone follow up imaging. Aneurysm growth will be recorded if there was any clinically observable growth, in the opinion of a consultant neuroradiologist or an MDT, when directly comparing baseline and follow up scans.

#### *Data transmission and editing*

The recruiting units will populate two data sheets, one containing patient identifiable details required for hospital admission database searches and a second containing clinical details only. These two spreadsheets will be cross-referenced using an aneurysm-level pseudonymisation number contained in both spreadsheets. Recruiting units will send each data sheet to the co-ordinating unit separately through a 256bit end to end encryption service.

The requirement for editing the data will be minimised through the use of restricted fields and pre-defined lists of valid codes for each element on the datasheet. All queries and discrepancies raised by the co-ordinating centre regarding the data entry will be submitted to the respective recruiting units through a single query sheet referencing the pseudonymisation number.

#### *Sample size*

There are no accepted methods for power calculation for validation studies of prognostic models. Earlier methods included the rule of thumb to have ten events for every covariate tested, however, more modern methods for minimum sample size calculation have been proposed by Riley *et al.*<sup>17</sup> The online package *pmsampsize* uses the Riley method to estimate the minimum sample size. Using figures from our feasibility work (2,124 patients with 60 rupture events over 4,010 patient years), estimating 28 degrees of freedom, and varying Cox-Snell R<sup>2</sup> value d from 0.03 to 0.05 resulted in a minimum sample size ranging from 5,143 to 8,559. The number of degrees of freedom allows for all categorical variables as well as continuous variables such as patient age or aneurysm size which may require polynomial equations.

The Riley method is yet to be widely utilized and does not consider the prevalence of uncommon variables such as ADPKD. The older rule of thumb requiring 10 events per covariate was therefore also considered. For the first objective, the 6 covariates in the PHASES score will be tested suggesting at least 60 SAHs will need to be captured. ISUIA recorded 51 ruptures in 1,692 patients over 4.1 years. Sixty events may therefore be expected in 1,990 patients with 8,161 years of follow up. For the second objective, 120 events will need to be observed to account for the 6 additional commonly occurring covariates which would be expected in 3,981 patients with 16,332 years of follow up.

However, the 10 events per covariate rule of thumb does not consider the prevalence of the covariate in the study population. Therefore, rarely occurring populations may have insufficient data to estimate risk. ADPKD is one such population and including it as a covariate requires a larger study size. In ADPKD 10 events are expected in 1,360 patient years of follow up assuming the risk of SAH is similar to the general population. However, 16,332 years follow up would only yield 195 years in patients with ADPKD (based on a population study which found 53/4,436 patients with UIA had



ADPKD).<sup>18</sup> Therefore 113,905 years of follow up would be required to capture 10 ruptures amongst 1,340 years follow up in ADPKD patients. This equates to a total cohort of 22,781 patients.

The TRIPOD guidelines highlight the lack of consensus of how to calculate a sample size and suggest aiming for larger sample sizes which give more precise and reliable results. Smaller sample sizes are at risk of performance optimism. Therefore, the ROAR study will aim to collect 20,000 patients. Based on feasibility studies, this is the maximum practical sample size, and power calculations show is sufficient to generate precise estimates and account for all covariates.

### *Statistical analysis*

- *Objective 1 - PHASES validation*

The PHASES study provides the coefficients from their Cox regression model and baseline survival at 5 years which allows the absolute 5-year risk of rupture to be calculated for all patients who are not censored before 5 years. Time to censoring will be calculated (whichever is soonest of the date of treatment, date of death or the HES/PEDW/SMD search date) to ensure 5 years of follow up if rupture has not occurred. Discrimination will be assessed using Harrell's C-index of concordance and Royston and Sauerbrei's D statistic. Calibration will be assessed at the 5 year time point using the method in Royston (2014).<sup>19</sup> These will be used to calculate the number of SAH events per 5 years for each PHASES score ( $\leq 2$  to 12+) and expressed as a percentage with 95% confidence interval to compare to the PHASES estimates.

- *Objective 2 - Additional prognostic factors*

A new risk prediction model for rupture will be developed using the total data set, including the additional possible risk factors. The Cox regression model will be used for risk of rupture. The absolute risks can be estimated at relevant time intervals, 2, 5 and 10 years. Numbers of missing values will be summarised for each factor. Multiple imputation will be used to replace missing values. Discrimination of the final model will be assessed with Harrell's C-statistic. Internal validity will be assessed by bootstrap resampling.

- *Objective 3 – Long term rupture rates*

All patients, including those who underwent aneurysm occlusion, will be included in time-to-event analysis which will cover the whole duration of available follow up. This will include Kaplan-Meier and proportional hazards models for univariate and multivariate survival curve fitting. A cumulative Hazard plot will be used to assess if rupture risk is constant or varies with time from diagnosis.

Once the cohort is established, funding will be sought for repeated searches at regular intervals (5 yearly) to update models and provide progressively longer-term rupture rates.

### *Patient and public involvement*

A workgroup was organised with the Wessex Subarachnoid Haemorrhage Support Group to discuss UIA research where it was confirmed that better decision making on aneurysm treatment is the main concern for patients, but patients do not want to have their management randomised and

1  
2  
3 therefore an RCT is unlikely to succeed. Consequently, a better understanding of the natural history  
4 of UIA was deemed the top priority and that long term, ideally lifetime risks, are what is relevant to  
5 patients. This formed the basis of the current study.  
6  
7

8 During May 2020, while face to face public involvement was not possible due to the COVID  
9 pandemic, patients in the neurovascular telephone clinic at University Hospital Southampton were  
10 surveyed to assess the study design. All patients strongly supported a study of the natural history of  
11 UIA. Although some said they would decline participation in imaging or interventional studies, all  
12 confirmed they would be happy for their records to be searched for a natural history study, without  
13 full informed consent as is proposed.  
14  
15  
16

## 17 **Ethics and dissemination**

### 18 *Ethical considerations (including informed consent)*

19  
20  
21 Seeking informed consent from all patients to break confidentiality and transfer their identifiable  
22 details is not possible without biasing the results. Patients whose aneurysm ruptures have a high  
23 likelihood of death or severe disability which would leave them unable to provide informed consent.  
24 If informed consent was mandatory, the final cohort would contain an underrepresentation of  
25 patients whose aneurysm ruptured, thus skewing the observed rupture rates.  
26  
27  
28

29  
30 In order to process patient identifiable data without consent the study has been given conditional  
31 support under Section 251 from the HRA Confidentiality Advisory Group (21/CAG/0033). This allows  
32 the transfer of patient identifiable data outside of the direct clinical care team for the purpose of this  
33 study. The patient identifiable data can thus be transferred to the co-ordinating team who in turn  
34 can upload this data to the HES/PEDW/SMD databases. The protocol has also been reviewed by the  
35 South Central Hampshire A Research Ethics Committee and issued a favourable opinion in March  
36 2021 (21/SC/0064). The REC and CAG committees will be updated on all significant protocol  
37 amendments by the study co-ordinator.  
38  
39  
40

### 41 *Monitoring*

42  
43 As a study without direct patient contact there will not be a separate data monitoring committee.  
44 Instead, this role will be conducted by the trial management committee.  
45  
46  
47

### 48 *Dissemination and data availability*

49  
50 The results will be disseminated in peer reviewed journals. Authorship will follow International  
51 Committee of Medical Journal Editors recommendations and professional writers will not be used.  
52 Upon completion of the study, the anonymised dataset will be available both to members of the  
53 ROAR collaboration and other external researchers. They will be available from the chief investigator  
54 upon reasonable request.  
55  
56  
57  
58

## 59 **Discussion**

1  
2  
3  
4  
5 Although the natural history of UIA has been previously investigated with multiple prospective  
6 cohort studies, the rupture rate has varied significantly between these. The design of the ROAR  
7 Study addresses many of the criticisms of these previous natural history studies. ISUIA<sup>7</sup> is the first  
8 natural history study and is drawn from a population that is genetically closest to that of the UK.  
9 However, its results are subject to selection bias with 71% of their UIA being treated either before  
10 inclusion or during follow-up. It is not known if that selection was random or based on a feature  
11 associated with risk such as aneurysm irregularity. It is therefore not known how the rupture rates in  
12 the remaining potentially lower-risk patients translate to the general population. The UK has a much  
13 lower treatment rate of UIA (approximately 20%). This is one of the lowest rates in a developed  
14 country making it the ideal setting for a natural history study. It remains however that there will be  
15 some treatments performed during the study which inevitably will produce some selection bias that  
16 cannot be eliminated. Other countries with lower treatment rates are likely to also have low  
17 availability of imaging and hence much lower case identification limiting the cohort size and  
18 introducing different biases.  
19  
20  
21  
22  
23

24 There is also a risk of selection bias in ROAR arising from the methods employed for patient  
25 identification. Patients in whom no MDT, clinic notes or radiology report was created would be  
26 effectively excluded. These are also the patients more likely to not undergo treatment. However, our  
27 survey of UK neurovascular surgeons suggest it is only a very small minority that are not discussed at  
28 MDT or seen in a neurosciences clinic. This was also borne out in pilot studies in the development of  
29 the protocol. The timeframe for searching patients within a unit's available records creates the  
30 potential for introducing prevalence-incidence selection bias. The ROAR Study will mitigate this by  
31 identifying patients as *new* or *follow-up* based on whether or not the UIA was diagnosed during that  
32 unit's search window and use the identifying document dates accordingly.  
33  
34  
35  
36  
37

38 The largest UIA studies are based on Japanese populations and the study with the least bias on a  
39 Finnish population. Both observed higher rates of aneurysm rupture than ISUIA. Although it has  
40 been assumed ethnicity is a risk factor for rupture and therefore included in the PHASES score, it is  
41 not known if the different rupture rates in these studies were due to differences in genetics,  
42 environment or study design (and consequently biases). The ROAR Study will observe rupture rates  
43 in a UK population which removes any concerns over the influence of ethnicity in the results and  
44 makes it generalisable for UIA decision making in patients in the UK. Given the use of national level  
45 databases ROAR is designed as a single country study and as a result there are limitations to its  
46 generalisability outside the UK. However, the UK's population probably more closely resembles most  
47 European and North American countries than Japan or Finland.  
48  
49  
50  
51

52 With the exception of the Juvela study,<sup>9</sup> the follow-up lengths of previous UIA natural history studies  
53 are less than 5 years. Patients are generally not interested in such short-term risks and want to know  
54 their lifetime risk. Unfortunately, it is not known if risk is constant over time and therefore if these  
55 short-term estimates can be extrapolated to a patient's lifetime. The hybrid design of the ROAR  
56 Study will immediately generate follow-up periods of up to 15 years per patient. These will still be  
57 shorter than the typical 30-year life expectancy of someone diagnosed with a UIA at 50 and there  
58 will still therefore be limitations to extrapolation. However, it will be possible to perform repeat  
59  
60

1  
2  
3 searches of the prospectively maintained databases for hospital admissions and deaths at intervals  
4 in the future such that ultimately it will yield realistic lifetime estimates.  
5  
6  
7

8 Long-term follow up of such a large cohort of patients is only feasible through the use of national  
9 databases. A traditional prospective study would be too costly and time consuming to be realistic as  
10 well as suffering significant loss to follow up. The risk posed by using national databases is that  
11 patients emigrating are not censored when they leave the country. However, these databases record  
12 when patients deregister their general practice at which time they will be censored from further  
13 analysis.  
14  
15  
16

17  
18 One of the limitations of using national databases for hospital admissions is that identifying rupture  
19 events relies on the accuracy of the hospital coders and the diagnosis codes they assign (both to the  
20 primary and secondary diagnoses). The ROAR Study will assess the magnitude of any miscoding by  
21 collecting any available follow up data from the neurosciences record. In cases where a confirmed  
22 aneurysm rupture occurred, we will examine which hospital codes were assigned to that episode.  
23 We will also mitigate this limitation by searching for codes for all types of intra-cranial haemorrhage,  
24 not just subarachnoid haemorrhage, and subsequently review the medical records and imaging  
25 studies to confirm the true diagnosis for that patient.  
26  
27  
28  
29

30 Whilst subject to a number of limitations, the ROAR study has mitigations for most of these and will  
31 therefore be less susceptible to them than previous studies. It is therefore expected to definitively  
32 evaluate the validity of PHASES, assess additional predictors of rupture and assess long term risks of  
33 rupture.  
34  
35  
36

### 37 **Contributors**

38  
39 DB conceived the study. DB, SH, and JB designed the protocol. JB provided statistical support and  
40 advised on study design. PG, DD and CH helped piloting and testing the protocol. CT, MT, JP, CU, HP,  
41 NG, IA, NT, JvB and JG provided further feedback on the protocol. ROAR Investigators, ROAR  
42 Investigators All remaining authors contributed to the set-up of the study, have reviewed the  
43 protocol and approved the final manuscript.  
44  
45  
46  
47

### 48 **Competing interests**

49 None of the authors have any conflicts to declare.  
50  
51  
52

### 53 **Funding**

54  
55 This study/project is funded by the National Institute for Health Research (NIHR) Research for  
56 Patient Benefit programme (NIHR203628). The views expressed are those of the author(s) and not  
57 necessarily those of the NIHR or the Department of Health and Social Care.  
58  
59  
60

This work is also supported by: Smile4Wessex (no grant number), and Royal College of Surgeons England (no grant number) and the Polycystic Kidney Disease Charity (PKD-21-03). Neither the sponsor nor any of the funding sources had a role in designing the study protocol. They will also have no role in the analysis of data nor submission of results.

### **Sponsor contact information**

Sponsor: University Hospital Southampton NHS Foundation Trust

Sponsor reference: RHM NEU0390

Contact name: Mrs Sharon Davies-Dear

Contact email: [sharon.davies-dear@uhs.nhs.uk](mailto:sharon.davies-dear@uhs.nhs.uk)

### **ROAR Collaborators**

Frederick Ewbank,<sup>1</sup> Stefan Mitrasinovic,<sup>1</sup> Oliver Croft,<sup>1</sup> Dominic Townsend<sup>1</sup>

Neeraj Kalra,<sup>3</sup> Imogen Kirkpatrick,<sup>3</sup> Nicole Handy<sup>3</sup>

Alex Rossdeutsch,<sup>4</sup> Ellie Courtney,<sup>4</sup> Zoe Stone<sup>4</sup>

James Loan,<sup>5</sup> Anthony Wiggins,<sup>5</sup> Jay Park,<sup>5</sup> Niamh Rafferty<sup>5</sup>

Nathan McSorley,<sup>6</sup> Ajitesh Anand,<sup>6</sup> Armin Nazari<sup>6</sup>

Giannis Sokratous,<sup>7</sup> Basel Taweel,<sup>7</sup> Kartik Goyal<sup>7</sup>

John Norris,<sup>8</sup> Hannah-Marie Culley<sup>8</sup>, Mukul Arora<sup>8</sup>

Milo Hollingworth,<sup>9</sup> Megan Burns,<sup>9</sup> Benjamin Armstrong<sup>9</sup>

Harsh Bhatt,<sup>10</sup> David Lowes,<sup>10</sup> Debra Faulkner<sup>10</sup>

Ciaran Hill,<sup>11</sup> Debayan Dasgupta,<sup>11</sup> Shuja Yaqub,<sup>11</sup> Yuzhi Phuah,<sup>11</sup> Olivier Sluijters,<sup>11</sup> Neda Oskooee,<sup>11</sup>

Viraj Pamar,<sup>11</sup> Tarek Elmenofi,<sup>11</sup> Justyna Ekert<sup>11</sup>

Alex Fung,<sup>13</sup> Rebecca Legge<sup>13</sup>

Srihari Deepak,<sup>15</sup> Vigneshwar Veerappan,<sup>14</sup> Swarnava Gupta,<sup>14</sup> Sumeet Sasane,<sup>14</sup> May Ting Tan<sup>15</sup>

Lucie Ferguson<sup>16</sup>

Matthew Myers,<sup>4,17</sup> Antonio Bonardi,<sup>17</sup> Holly Tetlow,<sup>17</sup> Charlotte Dunkerley,<sup>17</sup> Malvika Pandey,<sup>17</sup>

William Giffin,<sup>17</sup> Iqbal Bin Lokman,<sup>17</sup> Danielle Hurst,<sup>17</sup> Daniel Ahari<sup>17</sup>

Anouk Borg,<sup>18</sup> Thanos Papadias<sup>18</sup>

Kristy Kehoe,<sup>19</sup> Jeremy Cheong,<sup>19</sup> Isabella Davies,<sup>19</sup> Taisha Peplowska<sup>19</sup>

James Ulrich<sup>20</sup> Mohammed Draz,<sup>20</sup> Barbora Krivankova,<sup>20</sup> Katy Homyer,<sup>20</sup> Vivienne Evans,<sup>20</sup> Steven Tominey,<sup>20</sup> Attika Chaudhary,<sup>20</sup> Sabrina Tengku,<sup>20</sup> Eilidh Middleton,<sup>20</sup> Sytske Lub,<sup>20</sup> Hassan Ismahel,<sup>20</sup> Michalina Wilinska,<sup>20</sup> Nicola Duncan,<sup>20</sup> Joanne Igoli,<sup>20</sup> Ritika Sandaram<sup>20</sup>

1  
2  
3 Rebecca Hodnett,<sup>21</sup> Naadir Nazar,<sup>21</sup> Omar Ouaret Sorr,<sup>21</sup> Fatima Camp,<sup>21</sup> Tom Ferreira<sup>21</sup>  
4  
5 Benjamin Fisher,<sup>22</sup> Devika Rajashekar,<sup>22</sup> Rachel Dumbrell,<sup>22</sup> Ananya Muthukumar,<sup>22</sup> Mohammad  
6 Anas,<sup>22</sup> Lilian Nwosu,<sup>22</sup> Ariadne Holmes<sup>22</sup>  
7  
8 Ikenna Ogbu,<sup>23</sup> Madalina Pasca,<sup>23</sup> Veer Patel,<sup>23</sup> Mustafa Dashti,<sup>23</sup> Zeluleko Sibanda,<sup>23</sup> Erin Hwang,<sup>23</sup>  
9 Zara Adil<sup>23</sup>  
10  
11 Samir Matloob,<sup>24</sup> Vanessa Chow<sup>24</sup>  
12  
13 Rosa Sun,<sup>26</sup> Aparnu Vimal,<sup>26</sup> Talhah Chaudri,<sup>26</sup> Lauren Baldwin<sup>26</sup>  
14  
15 Haritha Maripi,<sup>27</sup> Balint Borbas,<sup>27</sup> Mariyam Mujeeb<sup>27</sup>  
16  
17  
18  
19

## References

- 1 Vlak, M. H., Algra, A., Brandenburg, R. & Rinkel, G. J. Prevalence of unruptured intracranial aneurysms, with emphasis on sex, age, comorbidity, country, and time period: a systematic review and meta-analysis. *Lancet Neurol* **10**, 626-636, doi:10.1016/S1474-4422(11)70109-0 (2011).
- 2 Cras, T. Y. *et al.* Determinants of the Presence and Size of Intracranial Aneurysms in the General Population: The Rotterdam Study. *Stroke* **51**, 2103-2110, doi:10.1161/STROKEAHA.120.029296 (2020).
- 3 de Rooij, N. K., Linn, F. H., van der Plas, J. A., Algra, A. & Rinkel, G. J. Incidence of subarachnoid haemorrhage: a systematic review with emphasis on region, age, gender and time trends. *J Neurol Neurosurg Psychiatry* **78**, 1365-1372, doi:10.1136/jnnp.2007.117655 (2007).
- 4 Greving, J. P. *et al.* Development of the PHASES score for prediction of risk of rupture of intracranial aneurysms: a pooled analysis of six prospective cohort studies. *Lancet Neurol* **13**, 59-66, doi:10.1016/S1474-4422(13)70263-1 (2014).
- 5 Nieuwkamp, D. J. *et al.* Changes in case fatality of aneurysmal subarachnoid haemorrhage over time, according to age, sex, and region: a meta-analysis. *Lancet Neurol* **8**, 635-642, doi:10.1016/S1474-4422(09)70126-7 (2009).
- 6 Algra, A. M. *et al.* Procedural Clinical Complications, Case-Fatality Risks, and Risk Factors in Endovascular and Neurosurgical Treatment of Unruptured Intracranial Aneurysms: A Systematic Review and Meta-analysis. *JAMA Neurol* **76**, 282-293, doi:10.1001/jamaneurol.2018.4165 (2019).
- 7 Wiebers, D. O. *et al.* Unruptured intracranial aneurysms: natural history, clinical outcome, and risks of surgical and endovascular treatment. *Lancet* **362**, 103-110 (2003).
- 8 Raymond, J. *et al.* Unruptured Intracranial Aneurysms. A Critical Review of the International Study of Unruptured Intracranial Aneurysms (ISUIA) and of Appropriate Methods to Address the Clinical Problem. *Interv Neuroradiol* **14**, 85-96, doi:10.1177/159101990801400111 (2008).
- 9 Juvela, S., Poussa, K., Lehto, H. & Porras, M. Natural history of unruptured intracranial aneurysms: a long-term follow-up study. *Stroke* **44**, 2414-2421, doi:10.1161/STROKEAHA.113.001838 (2013).
- 10 Morita, A. *et al.* The natural course of unruptured cerebral aneurysms in a Japanese cohort. *N Engl J Med* **366**, 2474-2482, doi:10.1056/NEJMoa1113260 (2012).
- 11 Wermer, M. J. *et al.* Yield of short-term follow-up CT/MR angiography for small aneurysms detected at screening. *Stroke* **37**, 414-418, doi:10.1161/01.STR.0000199077.06390.35 (2006).

- 1  
2  
3 12 Sonobe, M., Yamazaki, T., Yonekura, M. & Kikuchi, H. Small unruptured intracranial  
4 aneurysm verification study: SUAVe study, Japan. *Stroke* **41**, 1969-1977,  
5 doi:10.1161/STROKEAHA.110.585059 (2010).  
6  
7 13 Ishibashi, T. *et al.* Unruptured intracranial aneurysms: incidence of rupture and risk factors.  
8 *Stroke* **40**, 313-316, doi:10.1161/STROKEAHA.108.521674 (2009).  
9  
10 14 Delgado-Rodríguez, M. & Llorca, J. Bias. *J Epidemiol Community Health* **58**, 635-641,  
11 doi:10.1136/jech.2003.008466 (2004).  
12  
13 15 Hackenberg, K. A. M. *et al.* Definition and Prioritization of Data Elements for Cohort Studies  
14 and Clinical Trials on Patients with Unruptured Intracranial Aneurysms: Proposal of a  
15 Multidisciplinary Research Group. *Neurocrit Care* **30**, 87-101, doi:10.1007/s12028-019-  
16 00729-0 (2019).  
17  
18 16 Woodfield, R., Grant, I., Sudlow, C. L., Group, U. B. S. O. & Group, U. B. F.-U. a. O. W.  
19 Accuracy of Electronic Health Record Data for Identifying Stroke Cases in Large-Scale  
20 Epidemiological Studies: A Systematic Review from the UK Biobank Stroke Outcomes Group.  
21 *PLoS One* **10**, e0140533, doi:10.1371/journal.pone.0140533 (2015).  
22  
23 17 Riley, R. D. *et al.* Calculating the sample size required for developing a clinical prediction  
24 model. *BMJ* **368**, m441, doi:10.1136/bmj.m441 (2020).  
25  
26 18 Nurmonen, H. J. *et al.* Polycystic kidney disease among 4,436 intracranial aneurysm patients  
27 from a defined population. *Neurology* **89**, 1852-1859, doi:10.1212/WNL.0000000000004597  
28 (2017).  
29  
30 19 Royston, P. Tools for Checking Calibration of a Cox Model in External Validation: Approach  
31 Based on Individual Event Probabilities. *The Stata Journal* **14**, 738-755,  
32 doi:10.1177/1536867x1401400403 (2014).  
33  
34  
35  
36  
37  
38  
39  
40  
41  
42  
43  
44  
45  
46  
47  
48  
49  
50  
51  
52  
53  
54  
55  
56  
57  
58  
59  
60

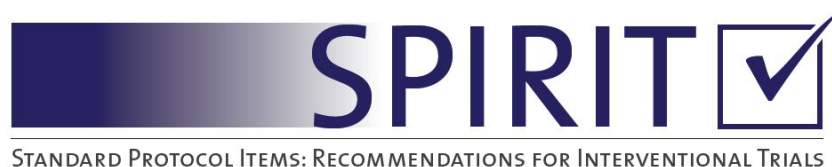

SPIRIT 2013 Checklist: Recommended items to address in a clinical trial protocol and related documents\*

| Section/item                      | Item No | Description                                                                                                                                                                                                                                                                              | Reported on page |
|-----------------------------------|---------|------------------------------------------------------------------------------------------------------------------------------------------------------------------------------------------------------------------------------------------------------------------------------------------|------------------|
| <b>Administrative information</b> |         |                                                                                                                                                                                                                                                                                          |                  |
| Title                             | 1       | Descriptive title identifying the study design, population, interventions, and, if applicable, trial acronym                                                                                                                                                                             | 1                |
| Trial registration                | 2a      | Trial identifier and registry name. If not yet registered, name of intended registry                                                                                                                                                                                                     | 3                |
|                                   | 2b      | All items from the World Health Organization Trial Registration Data Set                                                                                                                                                                                                                 | 3, 12            |
| Protocol version                  | 3       | Date and version identifier                                                                                                                                                                                                                                                              | 3                |
| Funding                           | 4       | Sources and types of financial, material, and other support                                                                                                                                                                                                                              | 12               |
| Roles and responsibilities        | 5a      | Names, affiliations, and roles of protocol contributors                                                                                                                                                                                                                                  | 12               |
|                                   | 5b      | Name and contact information for the trial sponsor                                                                                                                                                                                                                                       | 12               |
|                                   | 5c      | Role of study sponsor and funders, if any, in study design; collection, management, analysis, and interpretation of data; writing of the report; and the decision to submit the report for publication, including whether they will have ultimate authority over any of these activities | 12               |
|                                   | 5d      | Composition, roles, and responsibilities of the coordinating centre, steering committee, endpoint adjudication committee, data management team, and other individuals or groups overseeing the trial, if applicable (see Item 21a for data monitoring committee)                         | N/A              |
| <b>Introduction</b>               |         |                                                                                                                                                                                                                                                                                          |                  |
| Background and rationale          | 6a      | Description of research question and justification for undertaking the trial, including summary of relevant studies (published and unpublished) examining benefits and harms for each intervention                                                                                       | 4-5              |
|                                   | 6b      | Explanation for choice of comparators                                                                                                                                                                                                                                                    | N/A              |
| Objectives                        | 7       | Specific objectives or hypotheses                                                                                                                                                                                                                                                        | 5                |



|    |                                                           |     |                                                                                                                                                                                                                                                                                                                                                                                |
|----|-----------------------------------------------------------|-----|--------------------------------------------------------------------------------------------------------------------------------------------------------------------------------------------------------------------------------------------------------------------------------------------------------------------------------------------------------------------------------|
| 1  |                                                           |     |                                                                                                                                                                                                                                                                                                                                                                                |
| 2  | Trial design                                              | 8   | Description of trial design including type of trial (eg, parallel group, crossover, factorial, single group), allocation ratio, and framework (eg, superiority, equivalence, noninferiority, exploratory)                                                                                                                                                                      |
| 3  |                                                           |     |                                                                                                                                                                                                                                                                                                                                                                                |
| 4  |                                                           |     |                                                                                                                                                                                                                                                                                                                                                                                |
| 5  |                                                           |     |                                                                                                                                                                                                                                                                                                                                                                                |
| 6  |                                                           |     |                                                                                                                                                                                                                                                                                                                                                                                |
| 7  |                                                           |     |                                                                                                                                                                                                                                                                                                                                                                                |
| 8  | <b>Methods: Participants, interventions, and outcomes</b> |     |                                                                                                                                                                                                                                                                                                                                                                                |
| 9  |                                                           |     |                                                                                                                                                                                                                                                                                                                                                                                |
| 10 | Study setting                                             | 9   | Description of study settings (eg, community clinic, academic hospital) and list of countries where data will be collected. Reference to where list of study sites can be obtained                                                                                                                                                                                             |
| 11 |                                                           |     |                                                                                                                                                                                                                                                                                                                                                                                |
| 12 |                                                           |     |                                                                                                                                                                                                                                                                                                                                                                                |
| 13 |                                                           |     |                                                                                                                                                                                                                                                                                                                                                                                |
| 14 |                                                           |     |                                                                                                                                                                                                                                                                                                                                                                                |
| 15 | Eligibility criteria                                      | 10  | Inclusion and exclusion criteria for participants. If applicable, eligibility criteria for study centres and individuals who will perform the interventions (eg, surgeons, psychotherapists)                                                                                                                                                                                   |
| 16 |                                                           |     |                                                                                                                                                                                                                                                                                                                                                                                |
| 17 |                                                           |     |                                                                                                                                                                                                                                                                                                                                                                                |
| 18 |                                                           |     |                                                                                                                                                                                                                                                                                                                                                                                |
| 19 | Interventions                                             | 11a | Interventions for each group with sufficient detail to allow replication, including how and when they will be administered                                                                                                                                                                                                                                                     |
| 20 |                                                           |     |                                                                                                                                                                                                                                                                                                                                                                                |
| 21 |                                                           |     |                                                                                                                                                                                                                                                                                                                                                                                |
| 22 |                                                           | 11b | Criteria for discontinuing or modifying allocated interventions for a given trial participant (eg, drug dose change in response to harms, participant request, or improving/worsening disease)                                                                                                                                                                                 |
| 23 |                                                           |     |                                                                                                                                                                                                                                                                                                                                                                                |
| 24 |                                                           |     |                                                                                                                                                                                                                                                                                                                                                                                |
| 25 |                                                           |     |                                                                                                                                                                                                                                                                                                                                                                                |
| 26 |                                                           |     |                                                                                                                                                                                                                                                                                                                                                                                |
| 27 |                                                           |     |                                                                                                                                                                                                                                                                                                                                                                                |
| 28 |                                                           | 11c | Strategies to improve adherence to intervention protocols, and any procedures for monitoring adherence (eg, drug tablet return, laboratory tests)                                                                                                                                                                                                                              |
| 29 |                                                           |     |                                                                                                                                                                                                                                                                                                                                                                                |
| 30 |                                                           |     |                                                                                                                                                                                                                                                                                                                                                                                |
| 31 |                                                           |     |                                                                                                                                                                                                                                                                                                                                                                                |
| 32 |                                                           | 11d | Relevant concomitant care and interventions that are permitted or prohibited during the trial                                                                                                                                                                                                                                                                                  |
| 33 |                                                           |     |                                                                                                                                                                                                                                                                                                                                                                                |
| 34 |                                                           |     |                                                                                                                                                                                                                                                                                                                                                                                |
| 35 |                                                           |     |                                                                                                                                                                                                                                                                                                                                                                                |
| 36 | Outcomes                                                  | 12  | Primary, secondary, and other outcomes, including the specific measurement variable (eg, systolic blood pressure), analysis metric (eg, change from baseline, final value, time to event), method of aggregation (eg, median, proportion), and time point for each outcome. Explanation of the clinical relevance of chosen efficacy and harm outcomes is strongly recommended |
| 37 |                                                           |     |                                                                                                                                                                                                                                                                                                                                                                                |
| 38 |                                                           |     |                                                                                                                                                                                                                                                                                                                                                                                |
| 39 |                                                           |     |                                                                                                                                                                                                                                                                                                                                                                                |
| 40 |                                                           |     |                                                                                                                                                                                                                                                                                                                                                                                |
| 41 |                                                           |     |                                                                                                                                                                                                                                                                                                                                                                                |
| 42 |                                                           |     |                                                                                                                                                                                                                                                                                                                                                                                |
| 43 |                                                           |     |                                                                                                                                                                                                                                                                                                                                                                                |
| 44 |                                                           |     |                                                                                                                                                                                                                                                                                                                                                                                |
| 45 | Participant timeline                                      | 13  | Time schedule of enrolment, interventions (including any run-ins and washouts), assessments, and visits for participants. A schematic diagram is highly recommended (see Figure)                                                                                                                                                                                               |
| 46 |                                                           |     |                                                                                                                                                                                                                                                                                                                                                                                |
| 47 |                                                           |     |                                                                                                                                                                                                                                                                                                                                                                                |
| 48 |                                                           |     |                                                                                                                                                                                                                                                                                                                                                                                |
| 49 |                                                           |     |                                                                                                                                                                                                                                                                                                                                                                                |
| 50 | Sample size                                               | 14  | Estimated number of participants needed to achieve study objectives and how it was determined, including clinical and statistical assumptions supporting any sample size calculations                                                                                                                                                                                          |
| 51 |                                                           |     |                                                                                                                                                                                                                                                                                                                                                                                |
| 52 |                                                           |     |                                                                                                                                                                                                                                                                                                                                                                                |
| 53 |                                                           |     |                                                                                                                                                                                                                                                                                                                                                                                |
| 54 |                                                           |     |                                                                                                                                                                                                                                                                                                                                                                                |
| 55 | Recruitment                                               | 15  | Strategies for achieving adequate participant enrolment to reach target sample size                                                                                                                                                                                                                                                                                            |
| 56 |                                                           |     |                                                                                                                                                                                                                                                                                                                                                                                |
| 57 |                                                           |     |                                                                                                                                                                                                                                                                                                                                                                                |
| 58 |                                                           |     |                                                                                                                                                                                                                                                                                                                                                                                |
| 59 |                                                           |     |                                                                                                                                                                                                                                                                                                                                                                                |
| 60 |                                                           |     |                                                                                                                                                                                                                                                                                                                                                                                |

|    |                                                                     |     |                                                                                                                                                                                                                                                                                                                                                                                                              |     |
|----|---------------------------------------------------------------------|-----|--------------------------------------------------------------------------------------------------------------------------------------------------------------------------------------------------------------------------------------------------------------------------------------------------------------------------------------------------------------------------------------------------------------|-----|
| 1  | <hr/>                                                               |     |                                                                                                                                                                                                                                                                                                                                                                                                              |     |
| 2  |                                                                     |     |                                                                                                                                                                                                                                                                                                                                                                                                              |     |
| 3  | <b>Methods: Assignment of interventions (for controlled trials)</b> |     |                                                                                                                                                                                                                                                                                                                                                                                                              |     |
| 4  |                                                                     |     |                                                                                                                                                                                                                                                                                                                                                                                                              |     |
| 5  | Allocation:                                                         |     |                                                                                                                                                                                                                                                                                                                                                                                                              |     |
| 6  |                                                                     |     |                                                                                                                                                                                                                                                                                                                                                                                                              |     |
| 7  | Sequence                                                            | 16a | Method of generating the allocation sequence (eg, computer-generated random numbers), and list of any factors for stratification. To reduce predictability of a random sequence, details of any planned restriction (eg, blocking) should be provided in a separate document that is unavailable to those who enrol participants or assign interventions                                                     | N/A |
| 8  | generation                                                          |     |                                                                                                                                                                                                                                                                                                                                                                                                              |     |
| 9  |                                                                     |     |                                                                                                                                                                                                                                                                                                                                                                                                              |     |
| 10 |                                                                     |     |                                                                                                                                                                                                                                                                                                                                                                                                              |     |
| 11 |                                                                     |     |                                                                                                                                                                                                                                                                                                                                                                                                              |     |
| 12 |                                                                     |     |                                                                                                                                                                                                                                                                                                                                                                                                              |     |
| 13 |                                                                     |     |                                                                                                                                                                                                                                                                                                                                                                                                              |     |
| 14 |                                                                     |     |                                                                                                                                                                                                                                                                                                                                                                                                              |     |
| 15 | Allocation                                                          | 16b | Mechanism of implementing the allocation sequence (eg, central telephone; sequentially numbered, opaque, sealed envelopes), describing any steps to conceal the sequence until interventions are assigned                                                                                                                                                                                                    | N/A |
| 16 | concealment                                                         |     |                                                                                                                                                                                                                                                                                                                                                                                                              |     |
| 17 | mechanism                                                           |     |                                                                                                                                                                                                                                                                                                                                                                                                              |     |
| 18 |                                                                     |     |                                                                                                                                                                                                                                                                                                                                                                                                              |     |
| 19 |                                                                     |     |                                                                                                                                                                                                                                                                                                                                                                                                              |     |
| 20 |                                                                     |     |                                                                                                                                                                                                                                                                                                                                                                                                              |     |
| 21 | Implementation                                                      | 16c | Who will generate the allocation sequence, who will enrol participants, and who will assign participants to interventions                                                                                                                                                                                                                                                                                    | N/A |
| 22 |                                                                     |     |                                                                                                                                                                                                                                                                                                                                                                                                              |     |
| 23 |                                                                     |     |                                                                                                                                                                                                                                                                                                                                                                                                              |     |
| 24 | Blinding (masking)                                                  | 17a | Who will be blinded after assignment to interventions (eg, trial participants, care providers, outcome assessors, data analysts), and how                                                                                                                                                                                                                                                                    | N/A |
| 25 |                                                                     |     |                                                                                                                                                                                                                                                                                                                                                                                                              |     |
| 26 |                                                                     |     |                                                                                                                                                                                                                                                                                                                                                                                                              |     |
| 27 |                                                                     |     |                                                                                                                                                                                                                                                                                                                                                                                                              |     |
| 28 |                                                                     |     |                                                                                                                                                                                                                                                                                                                                                                                                              |     |
| 29 |                                                                     | 17b | If blinded, circumstances under which unblinding is permissible, and procedure for revealing a participant's allocated intervention during the trial                                                                                                                                                                                                                                                         | N/A |
| 30 |                                                                     |     |                                                                                                                                                                                                                                                                                                                                                                                                              |     |
| 31 |                                                                     |     |                                                                                                                                                                                                                                                                                                                                                                                                              |     |
| 32 |                                                                     |     |                                                                                                                                                                                                                                                                                                                                                                                                              |     |
| 33 | <b>Methods: Data collection, management, and analysis</b>           |     |                                                                                                                                                                                                                                                                                                                                                                                                              |     |
| 34 |                                                                     |     |                                                                                                                                                                                                                                                                                                                                                                                                              |     |
| 35 | Data collection                                                     | 18a | Plans for assessment and collection of outcome, baseline, and other trial data, including any related processes to promote data quality (eg, duplicate measurements, training of assessors) and a description of study instruments (eg, questionnaires, laboratory tests) along with their reliability and validity, if known. Reference to where data collection forms can be found, if not in the protocol | 5-7 |
| 36 | methods                                                             |     |                                                                                                                                                                                                                                                                                                                                                                                                              |     |
| 37 |                                                                     |     |                                                                                                                                                                                                                                                                                                                                                                                                              |     |
| 38 |                                                                     |     |                                                                                                                                                                                                                                                                                                                                                                                                              |     |
| 39 |                                                                     |     |                                                                                                                                                                                                                                                                                                                                                                                                              |     |
| 40 |                                                                     |     |                                                                                                                                                                                                                                                                                                                                                                                                              |     |
| 41 |                                                                     |     |                                                                                                                                                                                                                                                                                                                                                                                                              |     |
| 42 |                                                                     |     |                                                                                                                                                                                                                                                                                                                                                                                                              |     |
| 43 |                                                                     |     |                                                                                                                                                                                                                                                                                                                                                                                                              |     |
| 44 |                                                                     |     |                                                                                                                                                                                                                                                                                                                                                                                                              |     |
| 45 |                                                                     | 18b | Plans to promote participant retention and complete follow-up, including list of any outcome data to be collected for participants who discontinue or deviate from intervention protocols                                                                                                                                                                                                                    | N/A |
| 46 |                                                                     |     |                                                                                                                                                                                                                                                                                                                                                                                                              |     |
| 47 |                                                                     |     |                                                                                                                                                                                                                                                                                                                                                                                                              |     |
| 48 |                                                                     |     |                                                                                                                                                                                                                                                                                                                                                                                                              |     |
| 49 |                                                                     |     |                                                                                                                                                                                                                                                                                                                                                                                                              |     |
| 50 | Data management                                                     | 19  | Plans for data entry, coding, security, and storage, including any related processes to promote data quality (eg, double data entry; range checks for data values). Reference to where details of data management procedures can be found, if not in the protocol                                                                                                                                            | 7   |
| 51 |                                                                     |     |                                                                                                                                                                                                                                                                                                                                                                                                              |     |
| 52 |                                                                     |     |                                                                                                                                                                                                                                                                                                                                                                                                              |     |
| 53 |                                                                     |     |                                                                                                                                                                                                                                                                                                                                                                                                              |     |
| 54 |                                                                     |     |                                                                                                                                                                                                                                                                                                                                                                                                              |     |
| 55 |                                                                     |     |                                                                                                                                                                                                                                                                                                                                                                                                              |     |
| 56 |                                                                     |     |                                                                                                                                                                                                                                                                                                                                                                                                              |     |
| 57 | Statistical methods                                                 | 20a | Statistical methods for analysing primary and secondary outcomes. Reference to where other details of the statistical analysis plan can be found, if not in the protocol                                                                                                                                                                                                                                     | 8-9 |
| 58 |                                                                     |     |                                                                                                                                                                                                                                                                                                                                                                                                              |     |
| 59 |                                                                     |     |                                                                                                                                                                                                                                                                                                                                                                                                              |     |
| 60 |                                                                     |     |                                                                                                                                                                                                                                                                                                                                                                                                              |     |

|    |                                 |                                                             |                                                                  |
|----|---------------------------------|-------------------------------------------------------------|------------------------------------------------------------------|
| 1  |                                 |                                                             |                                                                  |
| 2  | 20b                             | Methods for any additional analyses (eg, subgroup and       | N/A                                                              |
| 3  |                                 | adjusted analyses)                                          |                                                                  |
| 4  |                                 |                                                             |                                                                  |
| 5  | 20c                             | Definition of analysis population relating to protocol non- | 8-9                                                              |
| 6  |                                 | adherence (eg, as randomised analysis), and any statistical |                                                                  |
| 7  |                                 | methods to handle missing data (eg, multiple imputation)    |                                                                  |
| 8  |                                 |                                                             |                                                                  |
| 9  | <b>Methods: Monitoring</b>      |                                                             |                                                                  |
| 10 |                                 |                                                             |                                                                  |
| 11 | Data monitoring                 | 21a                                                         | Composition of data monitoring committee (DMC); summary          |
| 12 |                                 |                                                             | of its role and reporting structure; statement of whether it is  |
| 13 |                                 |                                                             | independent from the sponsor and competing interests; and        |
| 14 |                                 |                                                             | reference to where further details about its charter can be      |
| 15 |                                 |                                                             | found, if not in the protocol. Alternatively, an explanation of  |
| 16 |                                 |                                                             | why a DMC is not needed                                          |
| 17 |                                 |                                                             |                                                                  |
| 18 |                                 |                                                             |                                                                  |
| 19 |                                 | 21b                                                         | Description of any interim analyses and stopping guidelines,     |
| 20 |                                 |                                                             | including who will have access to these interim results and      |
| 21 |                                 |                                                             | make the final decision to terminate the trial                   |
| 22 |                                 |                                                             |                                                                  |
| 23 |                                 |                                                             |                                                                  |
| 24 | Harms                           | 22                                                          | Plans for collecting, assessing, reporting, and managing         |
| 25 |                                 |                                                             | solicited and spontaneously reported adverse events and          |
| 26 |                                 |                                                             | other unintended effects of trial interventions or trial conduct |
| 27 |                                 |                                                             |                                                                  |
| 28 |                                 |                                                             |                                                                  |
| 29 | Auditing                        | 23                                                          | Frequency and procedures for auditing trial conduct, if any,     |
| 30 |                                 |                                                             | and whether the process will be independent from                 |
| 31 |                                 |                                                             | investigators and the sponsor                                    |
| 32 |                                 |                                                             |                                                                  |
| 33 | <b>Ethics and dissemination</b> |                                                             |                                                                  |
| 34 |                                 |                                                             |                                                                  |
| 35 | Research ethics                 | 24                                                          | Plans for seeking research ethics committee/institutional        |
| 36 | approval                        |                                                             | review board (REC/IRB) approval                                  |
| 37 |                                 |                                                             |                                                                  |
| 38 |                                 |                                                             |                                                                  |
| 39 | Protocol                        | 25                                                          | Plans for communicating important protocol modifications (eg,    |
| 40 | amendments                      |                                                             | changes to eligibility criteria, outcomes, analyses) to relevant |
| 41 |                                 |                                                             | parties (eg, investigators, REC/IRBs, trial participants, trial  |
| 42 |                                 |                                                             | registries, journals, regulators)                                |
| 43 |                                 |                                                             |                                                                  |
| 44 |                                 |                                                             |                                                                  |
| 45 | Consent or assent               | 26a                                                         | Who will obtain informed consent or assent from potential trial  |
| 46 |                                 |                                                             | participants or authorised surrogates, and how (see Item 32)     |
| 47 |                                 |                                                             |                                                                  |
| 48 |                                 | 26b                                                         | Additional consent provisions for collection and use of          |
| 49 |                                 |                                                             | participant data and biological specimens in ancillary studies,  |
| 50 |                                 |                                                             | if applicable                                                    |
| 51 |                                 |                                                             |                                                                  |
| 52 | Confidentiality                 | 27                                                          | How personal information about potential and enrolled            |
| 53 |                                 |                                                             | participants will be collected, shared, and maintained in order  |
| 54 |                                 |                                                             | to protect confidentiality before, during, and after the trial   |
| 55 |                                 |                                                             |                                                                  |
| 56 |                                 |                                                             |                                                                  |
| 57 | Declaration of                  | 28                                                          | Financial and other competing interests for principal            |
| 58 | interests                       |                                                             | investigators for the overall trial and each study site          |
| 59 |                                 |                                                             |                                                                  |
| 60 |                                 |                                                             |                                                                  |

|    |                               |     |                                                                                                                                                                                                                                                                                     |     |
|----|-------------------------------|-----|-------------------------------------------------------------------------------------------------------------------------------------------------------------------------------------------------------------------------------------------------------------------------------------|-----|
| 1  |                               |     |                                                                                                                                                                                                                                                                                     |     |
| 2  | Access to data                | 29  | Statement of who will have access to the final trial dataset, and disclosure of contractual agreements that limit such access for investigators                                                                                                                                     | 10  |
| 3  |                               |     |                                                                                                                                                                                                                                                                                     |     |
| 4  |                               |     |                                                                                                                                                                                                                                                                                     |     |
| 5  |                               |     |                                                                                                                                                                                                                                                                                     |     |
| 6  | Ancillary and post-trial care | 30  | Provisions, if any, for ancillary and post-trial care, and for compensation to those who suffer harm from trial participation                                                                                                                                                       | N/A |
| 7  |                               |     |                                                                                                                                                                                                                                                                                     |     |
| 8  |                               |     |                                                                                                                                                                                                                                                                                     |     |
| 9  |                               |     |                                                                                                                                                                                                                                                                                     |     |
| 10 | Dissemination policy          | 31a | Plans for investigators and sponsor to communicate trial results to participants, healthcare professionals, the public, and other relevant groups (eg, via publication, reporting in results databases, or other data sharing arrangements), including any publication restrictions | 10  |
| 11 |                               |     |                                                                                                                                                                                                                                                                                     |     |
| 12 |                               |     |                                                                                                                                                                                                                                                                                     |     |
| 13 |                               |     |                                                                                                                                                                                                                                                                                     |     |
| 14 |                               |     |                                                                                                                                                                                                                                                                                     |     |
| 15 |                               |     |                                                                                                                                                                                                                                                                                     |     |
| 16 |                               | 31b | Authorship eligibility guidelines and any intended use of professional writers                                                                                                                                                                                                      | 10  |
| 17 |                               |     |                                                                                                                                                                                                                                                                                     |     |
| 18 |                               |     |                                                                                                                                                                                                                                                                                     |     |
| 19 |                               |     |                                                                                                                                                                                                                                                                                     |     |
| 20 |                               | 31c | Plans, if any, for granting public access to the full protocol, participant-level dataset, and statistical code                                                                                                                                                                     | N/A |
| 21 |                               |     |                                                                                                                                                                                                                                                                                     |     |
| 22 |                               |     |                                                                                                                                                                                                                                                                                     |     |
| 23 | <b>Appendices</b>             |     |                                                                                                                                                                                                                                                                                     |     |
| 24 |                               |     |                                                                                                                                                                                                                                                                                     |     |
| 25 | Informed consent materials    | 32  | Model consent form and other related documentation given to participants and authorised surrogates                                                                                                                                                                                  | N/A |
| 26 |                               |     |                                                                                                                                                                                                                                                                                     |     |
| 27 |                               |     |                                                                                                                                                                                                                                                                                     |     |
| 28 |                               |     |                                                                                                                                                                                                                                                                                     |     |
| 29 | Biological specimens          | 33  | Plans for collection, laboratory evaluation, and storage of biological specimens for genetic or molecular analysis in the current trial and for future use in ancillary studies, if applicable                                                                                      | N/A |
| 30 |                               |     |                                                                                                                                                                                                                                                                                     |     |
| 31 |                               |     |                                                                                                                                                                                                                                                                                     |     |
| 32 |                               |     |                                                                                                                                                                                                                                                                                     |     |
| 33 |                               |     |                                                                                                                                                                                                                                                                                     |     |

\*It is strongly recommended that this checklist be read in conjunction with the SPIRIT 2013 Explanation & Elaboration for important clarification on the items. Amendments to the protocol should be tracked and dated. The SPIRIT checklist is copyrighted by the SPIRIT Group under the Creative Commons "[Attribution-NonCommercial-NoDerivs 3.0 Unported](https://creativecommons.org/licenses/by-nc-nd/3.0/)" license.
